# Supplementary material for: Glucocorticoid receptor coordinates transcription factor-dominated regulatory network in macrophages
Source: PubMed Central journal article supplement (PMC4133603; doi:10.1186/1471-2164-15-656), 2014-08-06
Supplement: 12864_2014_6351_MOESM2_ESM.pdf [file 12864_2014_6351_MOESM2_ESM.pdf]

**Table S1 Summary of RNA-seq experiments**

|                    | Untreated  | %      | Dex        | %      | LPS        | %      | LPS+Dex    | %      |
|--------------------|------------|--------|------------|--------|------------|--------|------------|--------|
| Exon-exon reads    | 10,937,370 | 15.36  | 10,141,134 | 14.93  | 10,619,836 | 15.11  | 10,227,155 | 14.83  |
| Exon-intron reads  | 184,875    | 0.26   | 180,216    | 0.27   | 182,942    | 0.26   | 171,746    | 0.25   |
| Total exon reads   | 66,883,256 | 93.90  | 62,942,208 | 92.66  | 65,955,587 | 93.85  | 63,991,848 | 92.78  |
| Total intron reads | 4,341,916  | 6.10   | 4,988,485  | 7.34   | 4,325,522  | 6.15   | 4,980,262  | 7.22   |
| Total gene reads   | 71,225,172 | 100.00 | 67,930,693 | 100.00 | 70,281,109 | 100.00 | 68,972,110 | 100.00 |

**Table S2 Genes regulated in BMMΦ treated for 1 h with Dex (D), LPS (L) and LPS+Dex (L+D) compared to untreated control (U)**  
 Unindexed expression values represent Log2 transformed average RPKMs. Expression values with z index were Z-transformed as described in Methods.

**Cluster 1**

| Feature ID    | Name                                                                           | FDR, P  | U     | D     | L     | (L+D) | Uz       | Dz       | Lz       | (L+D)z   |
|---------------|--------------------------------------------------------------------------------|---------|-------|-------|-------|-------|----------|----------|----------|----------|
| Cited2        | Cbp/p300-interacting transactivator, with Glu/Asp-rich carboxy-terminal domain | 0.00523 | 5.57  | 8.31  | 7.5   | 9.54  | -1.29618 | 0.348049 | -0.13802 | 1.086152 |
| Apbb3         | amyloid beta (A4) precursor protein-binding, family B, member 3                | 0.00836 | 2.29  | 3.13  | 3.96  | 4.71  | -1.17968 | -0.37568 | 0.41875  | 1.136607 |
| Plagl2        | pleiomorphic adenoma gene-like 2                                               | 0.00855 | 4.24  | 4.84  | 5.16  | 5.6   | -1.2582  | -0.2097  | 0.349499 | 1.118398 |
| Nfil3         | nuclear factor, interleukin 3, regulated                                       | 0.00986 | 2.71  | 4.25  | 4.47  | 5.95  | -1.23314 | -0.07165 | 0.094277 | 1.210514 |
| 2010002N04Rik | RIKEN cDNA 2010002N04 gene                                                     | 0.01000 | 2.86  | 3.47  | 4.2   | 5.33  | -1.04034 | -0.46604 | 0.221249 | 1.285127 |
| Dusp1         | dual specificity phosphatase 1                                                 | 0.01000 | 2.9   | 6.24  | 8.79  | 9.39  | -1.33015 | -0.19969 | 0.663382 | 0.866459 |
| Icosl         | icos ligand                                                                    | 0.01000 | 2.54  | 4.43  | 5.44  | 5.3   | -1.41354 | 0.001872 | 0.758257 | 0.653411 |
| Chka          | choline kinase alpha                                                           | 0.02000 | 1.09  | 2.14  | 1.76  | 2.5   | -1.29801 | 0.443728 | -0.18661 | 1.040894 |
| Mtmr12        | myotubularin related protein 12                                                | 0.02000 | 2.95  | 3.32  | 3.74  | 4.13  | -1.14398 | -0.42044 | 0.400883 | 1.163539 |
| Plaur         | plasminogen activator, urokinase receptor                                      | 0.03000 | 4.27  | 5.39  | 6.62  | 6.93  | -1.25712 | -0.33838 | 0.670602 | 0.924898 |
| Jdp2          | Jun dimerization protein 2                                                     | 0.04000 | 3.55  | 4.65  | 6.29  | 7.23  | -1.14255 | -0.47404 | 0.522657 | 1.093934 |
| Zfp811        | zinc finger protein 811                                                        | 0.04000 | 0.64  | 1.14  | 1.6   | 1.97  | -1.21146 | -0.34303 | 0.455925 | 1.098561 |
| Plscr1        | phospholipid scramblase 1                                                      | 0.05000 | 2.4   | 3.04  | 3.81  | 5.25  | -0.99825 | -0.47671 | 0.150756 | 1.324205 |
| Cebpb         | Cebpb                                                                          | 0.05000 | 6.97  | 7.99  | 8.92  | 9.46  |          |          |          |          |
| Med13         | mediator complex subunit 13                                                    | 0.06000 | 1.46  | 2.01  | 2.33  | 2.63  | -1.2939  | -0.19483 | 0.444622 | 1.044113 |
| Prr7          | proline rich 7 (synaptic)                                                      | 0.06000 | 0.4   | 0.77  | 1.15  | 1.73  | -1.07845 | -0.42698 | 0.242102 | 1.263333 |
| Adm           | adrenomedullin                                                                 | 0.07000 | 0.51  | 1.36  | 2.29  | 2.4   | -1.27528 | -0.316   | 0.73357  | 0.857713 |
| AI848100      | expressed sequence AI848100                                                    | 0.07000 | 2.23  | 2.61  | 3.05  | 3.83  | -1.0186  | -0.46565 | 0.174617 | 1.309631 |
| Mocs1         | molybdenum cofactor synthesis 1                                                | 0.08000 | 4.52  | 5.41  | 5.13  | 5.64  | -1.35356 | 0.48563  | -0.09299 | 0.960927 |
| Sap30         | sin3 associated polypeptide                                                    | 0.08000 | 3.8   | 4.51  | 5.1   | 5.09  | -1.34086 | -0.18691 | 0.772009 | 0.755756 |
| Tiparp        | TCDD-inducible poly(ADP-ribose) polymerase                                     | 0.08000 | 2.52  | 4.05  | 4.35  | 5.08  | -1.37379 | 0.046412 | 0.324883 | 1.002496 |
| Zfand5        | zinc finger, AN1-type domain 5                                                 | 0.10000 | 3.91  | 4.57  | 5.25  | 5.82  | -1.18041 | -0.38341 | 0.437746 | 1.126065 |
| 5730508B09Rik | RIKEN cDNA 5730508B09 gene                                                     | 0.11000 | 2.03  | 2.53  | 2.5   | 2.84  | -1.33187 | 0.164614 | 0.074824 | 1.092436 |
|               | Cluster average                                                                |         | 2.700 | 3.735 | 4.295 | 4.950 | -1.230   | -0.175   | 0.341    | 1.064    |
|               | Cluster SD                                                                     |         | 1.369 | 1.792 | 1.965 | 2.144 | 0.119    | 0.303    | 0.286    | 0.175    |

**Cluster 2**

| Feature ID    | Name                                                                                   | FDR, P  | U      | D    | L     | (L+D) | Uz       | Dz       | Lz       | (L+D)z   |
|---------------|----------------------------------------------------------------------------------------|---------|--------|------|-------|-------|----------|----------|----------|----------|
| Maff          | v-maf musculoaponeurotic fibrosarcoma oncogene family, protein F (avian)               | 0.0023  | 1.18   | 1.12 | 6.39  | 6.18  | -0.85552 | -0.87575 | 0.901035 | 0.830233 |
| Tnfaip3       | tumor necrosis factor, alpha-induced protein 3                                         | 0.0023  | 2.21   | 2.58 | 8.2   | 8.27  | -0.91994 | -0.81032 | 0.854757 | 0.875496 |
| Gramd1a       | GRAM domain containing 1A                                                              | 0.0023  | 4.88   | 4.87 | 6.24  | 6.27  | -0.85964 | -0.87219 | 0.847088 | 0.884736 |
| Gm16854       |                                                                                        | 0.0023  | 1.54   | 1.89 | 4.67  | 5.37  | -0.94459 | -0.76368 | 0.673229 | 1.03504  |
| Tnfsf9        | tumor necrosis factor (ligand) superfamily, member 9                                   | 0.0023  | 1.2    | 1.3  | 8.62  | 8.66  | -0.8777  | -0.85426 | 0.861292 | 0.870667 |
| Nfkbia        | nuclear factor of kappa light polypeptide gene enhancer in B-cells inhibitor, $\alpha$ | 0.00256 | 5.9    | 7.35 | 9.99  | 9.99  | -1.1854  | -0.47145 | 0.828423 | 0.828423 |
| Ccr12         | chemokine (C-C motif) receptor-like 2                                                  | 0.00423 | 2.44   | 2.44 | 8.06  | 7.85  | -0.86571 | -0.86571 | 0.898676 | 0.832747 |
| Errf1         | ERBB receptor feedback inhibitor 1                                                     | 0.00428 | 2.05   | 3.16 | 6.81  | 6.37  | -1.08321 | -0.61123 | 0.940764 | 0.753674 |
| Sdc4          | syndecan 4                                                                             | 0.00477 | 5.29   | 6.17 | 9.76  | 10.26 | -1.02979 | -0.67854 | 0.75438  | 0.953952 |
| Csf3          | colony stimulating factor 3 (granulocyte)                                              | 0.00492 | 0      | 0    | 4.16  | 4.44  | -0.86511 | -0.86511 | 0.808776 | 0.921442 |
| Cxcl1         | chemokine (C-X-C motif) ligand 1                                                       | 0.00592 | 1.12   | 0.78 | 9.05  | 9.56  | -0.82967 | -0.90006 | 0.81207  | 0.917655 |
| Siah2         | seven in absentia 2                                                                    | 0.0063  | 2.35   | 2.08 | 4.45  | 4.5   | -0.75976 | -0.96593 | 0.843757 | 0.881936 |
| Gem           | GTP binding protein (gene overexpressed in skeletal muscle)                            | 0.00661 | 0.13   | 0.13 | 4.64  | 4.46  | -0.86567 | -0.86567 | 0.90092  | 0.830413 |
| Sele          | selectin, endothelial cell                                                             | 0.00661 | 0.0073 | 0.02 | 1.47  | 2.6   | -0.81046 | -0.8003  | 0.355152 | 1.255606 |
| Dpep3         | dipeptidase 3                                                                          | 0.00731 | 0.55   | 0.76 | 2.05  | 2.12  | -0.98731 | -0.73446 | 0.818742 | 0.903025 |
| Cxcl3         | chemokine (C-X-C motif) ligand 3                                                       | 0.00804 | 0.74   | 0.64 | 5.42  | 5.33  | -0.84737 | -0.88433 | 0.88248  | 0.849214 |
| Ptger4        | prostaglandin E receptor 4 (subtype EP4)                                               | 0.00855 | 2.18   | 2.45 | 4.34  | 4.31  | -0.9779  | -0.74629 | 0.874965 | 0.84923  |
| Cd14          | CD14 antigen                                                                           | 0.00918 | 6.74   | 7.25 | 9.83  | 10.4  | -0.99278 | -0.71382 | 0.697409 | 1.009192 |
| Zc3h12c       | zinc finger CCCH type containing 12C                                                   | 0.00926 | 1.75   | 2.65 | 5.15  | 5.13  | -1.10552 | -0.58731 | 0.852171 | 0.840655 |
| Kdm6b         | KDM1 lysine (K)-specific demethylase 6B                                                | 0.00954 | 3.31   | 3.69 | 6.13  | 5.91  | -0.98914 | -0.72992 | 0.934564 | 0.784488 |
| Itpkc         | inositol 1,4,5-trisphosphate 3-kinase C                                                | 0.00974 | 1.83   | 1.79 | 4.55  | 5.52  | -0.83654 | -0.85755 | 0.592277 | 1.101819 |
| Marcks1       | MARCKS-like 1                                                                          | 0.00974 | 6.02   | 5.85 | 10.14 | 9.99  | -0.82975 | -0.90099 | 0.896804 | 0.833944 |
| Ets2          | E26 avian leukemia oncogene 2, 3' domain                                               | 0.01    | 3.79   | 3.77 | 6.15  | 6.18  | -0.85871 | -0.87324 | 0.855083 | 0.876869 |
| 2310014H01Rik | RIKEN cDNA 2310014H01 gene                                                             | 0.01    | 5.27   | 5.22 | 5.88  | 6.11  | -0.78909 | -0.90182 | 0.586185 | 1.104732 |
| Ccl7          | chemokine (C-C motif) ligand 7                                                         | 0.01    | 1.78   | 1.14 | 6.48  | 6.92  | -0.75611 | -0.96651 | 0.788984 | 0.933631 |
| Rabgef1       | RAB guanine nucleotide exchange factor (GEF) 1                                         | 0.01    | 2.8    | 2.78 | 4.84  | 5.09  | -0.85522 | -0.8711  | 0.763947 | 0.962375 |
| Bcl2a1c       | B-cell leukemia/lymphoma 2 related protein A1c                                         | 0.01    | 0.04   | 0.09 | 2.23  | 2.82  | -0.8711  | -0.8364  | 0.648987 | 1.058509 |
| Cflar         | CASP8 and FADD-like apoptosis regulator                                                | 0.01    | 3.34   | 3.69 | 5.93  | 5.89  | -0.98726 | -0.7355  | 0.875765 | 0.846993 |
| Hbegf         | heparin-binding EGF-like growth factor                                                 | 0.01    | 0.54   | 0.39 | 1.96  | 2.26  | -0.779   | -0.93532 | 0.700841 | 1.013484 |
| Cxcl2         | chemokine (C-X-C motif) ligand 2                                                       | 0.02    | 1.11   | 0.6  | 8.88  | 8.87  | -0.81014 | -0.92017 | 0.86623  | 0.864072 |
| Fosl2         | fos-like antigen 2                                                                     | 0.02    | 3.57   | 4.08 | 5.27  | 5.45  | -1.11954 | -0.56114 | 0.741797 | 0.93888  |
| 9930022D16Rik | RIKEN cDNA 9930022D16 gene                                                             | 0.02    | 0.43   | 0.63 | 1.62  | 2.12  | -0.95738 | -0.70871 | 0.522206 | 1.14388  |
| Zc3h12a       | zinc finger CCCH type containing 12A                                                   | 0.02    | 4.1    | 4.77 | 6.59  | 6.94  | -1.08682 | -0.60138 | 0.717303 | 0.970896 |
| Dusp2         | dual specificity phosphatase 2                                                         | 0.02    | 2.12   | 3.26 | 7.48  | 7.88  | -1.04862 | -0.65859 | 0.785181 | 0.922032 |
| Vcam1         | vascular cell adhesion molecule 1                                                      | 0.02    | 0.98   | 1.24 | 3.92  | 3.78  | -0.94546 | -0.78158 | 0.907643 | 0.8194   |
| Cd40          | CD40 antigen                                                                           | 0.02    | 2.02   | 2.18 | 5.36  | 5.19  | -0.90844 | -0.82127 | 0.911165 | 0.81855  |
| Eif1          | eukaryotic translation initiation factor 1                                             | 0.02    | 6.3    | 6.28 | 6.82  | 7.14  | -0.7989  | -0.8466  | 0.441185 | 1.204317 |
| Cxcl5         | chemokine (C-X-C motif) ligand 5                                                       | 0.02    | 0.19   | 0.15 | 0.87  | 1.45  | -0.76749 | -0.83213 | 0.331235 | 1.268386 |
| Trim13        | tripartite motif-containing 13                                                         | 0.03    | 1.48   | 1.76 | 3.85  | 3.85  | -0.97094 | -0.75432 | 0.862632 | 0.862632 |
| Ccrn4l        | CCR4 carbon catabolite repression 4-like (S. cerevisiae)                               | 0.03    | 1.04   | 1.14 | 4.47  | 4.41  | -0.89161 | -0.83992 | 0.881269 | 0.850257 |
| Gm13822       | predicted gene 13822                                                                   | 0.03    | 0.26   | 0.49 | 1.41  | 1.76  | -1.00109 | -0.6813  | 0.597876 | 1.084519 |
| Slnf2         | schlafen 2                                                                             | 0.03    | 7.24   | 7.85 | 9.31  | 9.59  | -1.10942 | -0.57125 | 0.716824 | 0.963853 |
| Gbp5          | guanylate binding protein 5                                                            | 0.03    | 1.17   | 1.29 | 4.95  | 4.91  | -0.89385 | -0.83769 | 0.875132 | 0.856413 |
| N4bp1         | NEDD4 binding protein 1                                                                | 0.03    | 3.95   | 4.38 | 5.39  | 5.7   | -1.09616 | -0.57533 | 0.648005 | 1.023485 |
| Birc3         | baculoviral IAP repeat-containing 3                                                    | 0.03    | 4.17   | 4.55 | 6.15  | 5.99  | -1.04342 | -0.66399 | 0.933585 | 0.773827 |
| Dnajb4        | Dnaj (Hsp40) homolog, subfamily B, member 4                                            | 0.03    | 1.98   | 2.07 | 3.86  | 4.12  | -0.90128 | -0.82234 | 0.747781 | 0.975843 |
| Sbds          | Shwachman-Bodian-Diamond syndrome homolog (human)                                      | 0.04    | 4.24   | 4.22 | 5.32  | 5.28  | -0.84947 | -0.88183 | 0.898008 | 0.833287 |
| Arf2          | ADP-ribosylation factor 2                                                              | 0.04    | 4.29   | 4.18 | 4.64  | 5.1   | -0.63351 | -0.89898 | 0.211171 | 1.321325 |
| Ehd1          | EH-domain containing 1                                                                 | 0.04    | 6.6    | 6.5  | 8.48  | 8.52  | -0.82099 | -0.90974 | 0.847615 | 0.883117 |
| C5ar1         | complement component 5a receptor 1                                                     | 0.04    | 7.85   | 7.8  | 8.84  | 8.8   | -0.82166 | -0.9086  | 0.899909 | 0.830351 |

|                |                                                                               |      |        |        |        |        |          |          |          |          |
|----------------|-------------------------------------------------------------------------------|------|--------|--------|--------|--------|----------|----------|----------|----------|
| AC159314.1     | Icam5 - predicted miRNA mmu-mir-1900                                          | 0.05 | 0.27   | 0.34   | 1.56   | 1.63   | -0.91168 | -0.81783 | 0.817829 | 0.911678 |
| Ube2f          | ubiquitin-conjugating enzyme E2F (putative)                                   | 0.05 | 3.64   | 3.7    | 4.51   | 4.71   | -0.91014 | -0.80093 | 0.673507 | 1.037565 |
| Clec4e         | C-type lectin domain family 4, member e                                       | 0.04 | 2.07   | 2.58   | 6.55   | 6.73   | -0.9646  | -0.76069 | 0.826659 | 0.898629 |
| Snx20          | sorting nexin 20                                                              | 0.05 | 5.61   | 5.6    | 6.52   | 6.55   | -0.85647 | -0.87508 | 0.837847 | 0.893703 |
| Irak2          | interleukin-1 receptor-associated kinase 2                                    | 0.05 | 3.4    | 3.44   | 5.01   | 4.97   | -0.8878  | -0.84369 | 0.887802 | 0.843687 |
| Gch1           | GTP cyclohydrolase 1                                                          | 0.05 | 2.5    | 2.53   | 4.4    | 4.32   | -0.87964 | -0.85149 | 0.903093 | 0.82803  |
| Sema6d         | sema domain, transmembrane domain (TM), and cytoplasmic domain, (sem          | 0.04 | 0.59   | 0.81   | 1.65   | 1.64   | -1.05343 | -0.65557 | 0.863544 | 0.845459 |
| Mobkl2c        | MOB1, Mps One Binder kinase activator-like 2C (yeast)                         | 0.05 | 3.26   | 2.99   | 4.34   | 4.66   | -0.68038 | -1.01287 | 0.649591 | 1.043655 |
| Fam177a        | family with sequence similarity 177, member A                                 | 0.05 | 1.25   | 1.12   | 2.2    | 2.68   | -0.74753 | -0.92029 | 0.514964 | 1.152856 |
| F3             | coagulation factor III                                                        | 0.04 | 0.09   | 0.16   | 1.69   | 2.85   | -0.8351  | -0.78232 | 0.371367 | 1.246058 |
| Mia1           | melanoma inhibitory activity 1                                                | 0.05 | 0.46   | 0.5    | 0.98   | 1.37   | -0.85069 | -0.7581  | 0.353008 | 1.255784 |
| Plk2           | polo-like kinase 2 (Drosophila)                                               | 0.04 | 3.59   | 2.49   | 5.54   | 6.51   | -0.5166  | -1.11953 | 0.552226 | 1.083898 |
| Gm6377         | predicted gene 6377                                                           | 0.07 | 1.23   | 1.52   | 4.72   | 5.23   | -0.92964 | -0.79103 | 0.738452 | 0.982212 |
| Rnf19b         | ring finger protein 19B                                                       | 0.06 | 5.62   | 5.92   | 7.8    | 8.11   | -0.97547 | -0.73994 | 0.736019 | 0.979396 |
| Gtf2ird2       | GTF2I repeat domain containing 2                                              | 0.07 | 1.81   | 1.97   | 3.62   | 3.64   | -0.94364 | -0.78471 | 0.854239 | 0.874105 |
| Slc25a25       | solute carrier family 25 (mitochondrial carrier, phosphate carrier), member 2 | 0.06 | 2.03   | 2.32   | 3.65   | 3.84   | -1.01371 | -0.69761 | 0.752106 | 0.959208 |
| Slc25a33       | solute carrier family 25, member 33                                           | 0.06 | 1.94   | 1.88   | 2.87   | 3.12   | -0.80689 | -0.90135 | 0.657317 | 1.050921 |
| Cd69           | CD69 antigen                                                                  | 0.06 | 1.09   | 0.98   | 4.5    | 5.65   | -0.82573 | -0.87196 | 0.60722  | 1.090474 |
| Mex3c          | mex3 homolog C (C. elegans)                                                   | 0.06 | 3      | 3.21   | 4.31   | 4.24   | -1.01245 | -0.70431 | 0.909734 | 0.807022 |
| Dusp16         | dual specificity phosphatase 16                                               | 0.08 | 1.08   | 1.13   | 2.76   | 3.05   | -0.88419 | -0.8364  | 0.721693 | 0.998899 |
| Igslf6         | immunoglobulin superfamily, member 6                                          | 0.08 | 4.04   | 4.25   | 5.65   | 5.99   | -0.96102 | -0.7469  | 0.680618 | 1.027299 |
| BC006779       | cDNA sequence BC006779                                                        | 0.08 | 2.46   | 2.68   | 4.11   | 4.19   | -0.98124 | -0.74138 | 0.817701 | 0.904922 |
| Ankrd33b       | ankyrin repeat domain 33B                                                     | 0.08 | 2.54   | 2.47   | 3.72   | 3.79   | -0.81625 | -0.91309 | 0.816249 | 0.913092 |
| Tlr2           | toll-like receptor 2                                                          | 0.08 | 4.75   | 4.59   | 7.75   | 7.8    | -0.8208  | -0.90999 | 0.85146  | 0.879331 |
| 1810029B16Rik  | RIKEN cDNA 1810029B16 gene                                                    | 0.08 | 1.21   | 1.26   | 2.08   | 2.36   | -0.89159 | -0.80545 | 0.607315 | 1.089721 |
| Pde4b          | phosphodiesterase 4B, cAMP specific                                           | 0.07 | 2.06   | 2.12   | 5.21   | 5.05   | -0.88242 | -0.84826 | 0.910886 | 0.819798 |
| Gm15832        | predicted gene 15832                                                          | 0.09 | 1.83   | 1.94   | 2.66   | 3.42   | -0.85838 | -0.70909 | 0.26803  | 1.299438 |
| Bcl2a1b        | B-cell leukemia/lymphoma 2 related protein A1b                                | 0.09 | 3.49   | 3.44   | 7.56   | 7.84   | -0.85484 | -0.87526 | 0.807857 | 0.922244 |
| Gtf2b          | general transcription factor IIB                                              | 0.1  | 4.38   | 4.39   | 5.35   | 5.37   | -0.87479 | -0.85703 | 0.848149 | 0.883674 |
| Il10           | interleukin 10                                                                | 0.1  | 2.02   | 1.72   | 6.63   | 7.5    | -0.80969 | -0.90893 | 0.715403 | 1.003218 |
| a              | nonagouti                                                                     | 0.09 | 0.35   | 0.53   | 2.13   | 2.14   | -0.95529 | -0.77188 | 0.858492 | 0.868682 |
| Tmem88         | transmembrane protein 88                                                      | 0.1  | 0.16   | 0.17   | 1.49   | 1.48   | -0.87256 | -0.85944 | 0.872561 | 0.85944  |
| Cdk5r1         | cyclin-dependent kinase 5, regulatory subunit 1 (p35)                         | 0.09 | 0.5    | 0.41   | 1.98   | 1.94   | -0.81337 | -0.91683 | 0.888092 | 0.842107 |
| Ier2           | immediate early response 2                                                    | 0.09 | 3.85   | 3.53   | 6.65   | 6.71   | -0.77106 | -0.95588 | 0.846143 | 0.880797 |
| 1700047117Rik2 | RIKEN cDNA 1700047117 gene 2                                                  | 0.09 | 1.31   | 1.02   | 2.19   | 2.67   | -0.63693 | -1.01582 | 0.512809 | 1.139939 |
| Ccl12          | chemokine (C-C motif) ligand 12                                               | 0.11 | 1      | 1.21   | 5.03   | 5.67   | -0.9032  | -0.81805 | 0.730873 | 0.990378 |
| Ifrd1          | interferon-related developmental regulator 1 (predicted miRNA mmu-mir-19      | 0.11 | 1.48   | 1.57   | 4.34   | 4.18   | -0.89352 | -0.83659 | 0.915658 | 0.814445 |
| Rffl           | ring finger and FYVE like domain containing protein                           | 0.1  | 2.3    | 2.6    | 3.57   | 3.81   | -1.05063 | -0.64129 | 0.682227 | 1.009696 |
| Ptx3           | pentraxin related gene                                                        | 0.11 | 0.09   | 0.12   | 1.46   | 2.91   | -0.78795 | -0.76554 | 0.235265 | 1.318229 |
|                | Cluster average                                                               |      | 2.4766 | 2.5919 | 5.0091 | 5.2352 | -0.89452 | -0.8087  | 0.747048 | 0.956171 |
|                | Cluster SD                                                                    |      | 1.9137 | 1.9998 | 2.3709 | 2.3057 | 0.113799 | 0.112627 | 0.173338 | 0.136569 |

### Cluster 3

| Feature ID    | Name                                                                            | FDR, P  | U    | D    | L    | (L+D) | Uz       | Dz       | Lz       | (L+D)z   |
|---------------|---------------------------------------------------------------------------------|---------|------|------|------|-------|----------|----------|----------|----------|
| Phlda1        | pleckstrin homology-like domain, family A, member 1                             | 0.0023  | 1.34 | 0.84 | 5.76 | 5.3   | -0.76404 | -0.95796 | 0.950203 | 0.771797 |
| Nfkbiz        | nuclear factor of kappa light polypeptide gene enhancer in B-cells inhibitor, z | 0.0023  | 3.65 | 2.75 | 8.41 | 8.18  | -0.70719 | -1.01064 | 0.897691 | 0.820144 |
| Socs3         | suppressor of cytokine signaling 3                                              | 0.00291 | 2.8  | 2.27 | 8.77 | 8.55  | -0.78936 | -0.93891 | 0.895169 | 0.833093 |
| Pim1          | proviral integration site 1                                                     | 0.00307 | 4.62 | 3.16 | 8.51 | 7.77  | -0.54854 | -1.12264 | 0.981085 | 0.690102 |
| Dnajb5        | Dnaj (Hsp40) homolog, subfamily B, member 5                                     | 0.00307 | 1.64 | 1.48 | 2.38 | 2.28  | -0.676   | -1.03062 | 0.964131 | 0.742491 |
| Ccl4          | chemokine (C-C motif) ligand 4                                                  | 0.00423 | 3.71 | 2.26 | 10.3 | 9.88  | -0.68164 | -1.03119 | 0.907039 | 0.805788 |
| Icam1         | intercellular adhesion molecule 1                                               | 0.00423 | 5.03 | 4.43 | 8.46 | 8.14  | -0.71403 | -1.00252 | 0.935208 | 0.781343 |
| Gadd45b       | growth arrest and DNA-damage-inducible 45 beta                                  | 0.00477 | 4.4  | 3.92 | 8.04 | 7.73  | -0.75003 | -0.97192 | 0.932627 | 0.789324 |
| 2310016C08Rik | Hilpda, hypoxia inducible lipid droplet associated                              | 0.00492 | 3.69 | 2.94 | 6.46 | 6.2   | -0.63961 | -1.06319 | 0.924818 | 0.777977 |
| Tnf           | tumor necrosis factor                                                           | 0.00492 | 2.6  | 0.67 | 9.68 | 8.41  | -0.62544 | -1.06599 | 0.990663 | 0.700768 |
| Ccl2          | chemokine (C-C motif) ligand 2                                                  | 0.00641 | 2.46 | 1.33 | 7.73 | 7.26  | -0.68316 | -1.02857 | 0.927698 | 0.784035 |
| Rab20         | RAB20, member RAS oncogene family                                               | 0.00729 | 4.89 | 4.43 | 7.15 | 7.17  | -0.70076 | -1.01679 | 0.851903 | 0.865644 |
| Dusp5         | dual specificity phosphatase 5                                                  | 0.00747 | 2.79 | 1.71 | 6.93 | 6.63  | -0.64969 | -1.05645 | 0.909561 | 0.796572 |
| Rasgef1b      | RasGEF domain family, member 1B                                                 | 0.0079  | 4.54 | 2.56 | 8.41 | 7.78  | -0.46505 | -1.18303 | 0.938262 | 0.709816 |
| Nfkbie        | nuclear factor of kappa light polypeptide gene enhancer in B-cells inhibitor, e | 0.00908 | 3.19 | 2.7  | 6.29 | 5.95  | -0.72599 | -0.99098 | 0.950418 | 0.766553 |
| Prdm1         | PR domain containing 1, with ZNF domain                                         | 0.00954 | 2.72 | 1.58 | 5.43 | 4.68  | -0.49935 | -1.1444  | 1.034062 | 0.609686 |
| Skil          | SKI-like                                                                        | 0.01    | 3.27 | 2.88 | 5.44 | 4.98  | -0.69412 | -1.00438 | 1.032227 | 0.666274 |
| Mapk6         | mitogen-activated protein kinase 6                                              | 0.01    | 4.94 | 4.73 | 6.29 | 6.09  | -0.72357 | -0.98898 | 0.982663 | 0.729888 |
| Ier5          | represses cdc25B                                                                | 0.01    | 4.27 | 3.02 | 5.81 | 5.47  | -0.2939  | -1.28016 | 0.921161 | 0.6529   |
| 4930430E12Rik | RIKEN cDNA 4930430E12 gene                                                      | 0.02    | 3.52 | 3.03 | 5.05 | 4.44  | -0.54035 | -1.08069 | 1.146857 | 0.474181 |
| Ccl3          | chemokine (C-C motif) ligand 3                                                  | 0.02    | 4.94 | 3.57 | 9.85 | 9.04  | -0.62294 | -1.06977 | 0.978447 | 0.714266 |
| Cdc42ep2      | CDC42 effector protein (Rho GTPase binding) 2                                   | 0.02    | 1.84 | 1.09 | 5.51 | 4.67  | -0.67085 | -1.02086 | 1.041865 | 0.649853 |
| Junb          | Jun-B oncogene                                                                  | 0.02    | 5.88 | 4.51 | 9.23 | 8.67  | -0.52986 | -1.1386  | 0.958644 | 0.709818 |
| Bcl6          | B-cell leukemia/lymphoma 6                                                      | 0.02    | 3.19 | 2.49 | 4.58 | 4.17  | -0.44129 | -1.18117 | 1.027912 | 0.594551 |
| Nod2          | nucleotide-binding oligomerization domain containing 2                          | 0.02    | 1.31 | 0.98 | 3.82 | 3.73  | -0.75418 | -0.97059 | 0.891898 | 0.832875 |
| Cd83          | CD83 antigen                                                                    | 0.02    | 4.37 | 3.66 | 8.42 | 7.61  | -0.69973 | -1.00175 | 1.023015 | 0.678465 |
| Tnfaip2       | tumor necrosis factor, alpha-induced protein 2                                  | 0.03    | 6.24 | 5.67 | 9.05 | 8.52  | -0.67888 | -1.02132 | 1.009305 | 0.690893 |
| Irf1          | interferon regulatory factor 1                                                  | 0.03    | 4.66 | 3.52 | 7.48 | 6.46  | -0.48982 | -1.13164 | 1.097864 | 0.523597 |
| Nfkbid        | nuclear factor of kappa light polypeptide gene enhancer in B-cells inhibitor, d | 0.03    | 3    | 2    | 5.88 | 5.29  | -0.56562 | -1.10818 | 0.996951 | 0.676841 |
| 3110043O21Rik | RIKEN cDNA 3110043O21 gene                                                      | 0.03    | 3.48 | 3.17 | 4.69 | 4.51  | -0.64288 | -1.05592 | 0.969318 | 0.729487 |
| Mtmr14        | myotubularin related protein 14                                                 | 0.03    | 4.34 | 4.21 | 5.35 | 5.22  | -0.74838 | -0.9695  | 0.969496 | 0.748383 |
| Insig1        | insulin induced gene 1                                                          | 0.03    | 4.4  | 3.98 | 5.35 | 5.06  | -0.47833 | -1.15362 | 1.049115 | 0.582842 |
| 2210403K04Rik | mir22                                                                           | 0.04    | 3.43 | 3.05 | 5.2  | 4.88  | -0.67055 | -1.02943 | 1.001099 | 0.698881 |
| Pvr           | poliovirus receptor                                                             | 0.04    | 1.9  | 1.6  | 4.08 | 4.09  | -0.75166 | -0.97328 | 0.858776 | 0.866163 |
| Batf          | basic leucine zipper transcription factor, ATF-like                             | 0.05    | 4.25 | 3.97 | 4.96 | 4.85  | -0.54195 | -1.13124 | 0.95235  | 0.72084  |
| Tmem171       | transmembrane protein 171                                                       | 0.04    | 2.28 | 2    | 3.56 | 3.26  | -0.65813 | -1.03041 | 1.043702 | 0.644835 |
| Adora2b       | adenosine A2b receptor                                                          | 0.07    | 1.96 | 1.2  | 5.11 | 4.75  | -0.65925 | -1.04614 | 0.944329 | 0.761063 |
| Lcp2          | lymphocyte cytosolic protein 2                                                  | 0.06    | 4.77 | 4.63 | 6.33 | 6.25  | -0.78775 | -0.93987 | 0.907269 | 0.820345 |

|         |                                   |        |        |        |        |          |          |          |          |          |
|---------|-----------------------------------|--------|--------|--------|--------|----------|----------|----------|----------|----------|
| Tgfb1   | TGFB-induced factor homeobox 1    | 0.07   | 4.19   | 3.14   | 5.56   | 5.12     | -0.29125 | -1.26986 | 0.985599 | 0.575515 |
| Gm10941 | predicted gene 10941              | 0.08   | 0.64   | 0.42   | 1.39   | 1.35     | -0.62818 | -1.07398 | 0.891607 | 0.810552 |
| Rhbf2   | rhomboid 5 homolog 2 (Drosophila) | 0.09   | 3.93   | 3.59   | 5.58   | 5.33     | -0.68182 | -1.02399 | 0.978706 | 0.727111 |
| Egr1    | early growth response 1           | 0.09   | 2.34   | 1.88   | 6.9    | 6.61     | -0.7776  | -0.94854 | 0.916957 | 0.809189 |
| Hpn     | hepsin                            | 0.1    | 2.14   | 1.65   | 3.37   | 2.92     | -0.4928  | -1.12825 | 1.102317 | 0.518737 |
|         | Cluster average                   | 3.4779 | 2.7598 | 6.3384 | 5.936  | -0.63106 | -1.05553 | 0.96907  | 0.717523 |          |
|         | Cluster SD                        | 1.2848 | 1.2684 | 2.0529 | 1.9341 | 0.121267 | 0.081904 | 0.064721 | 0.094224 |          |

#### Cluster 4

| Feature ID         | Name                                                                         | FDR, P  | U    | D    | L    | (L+D) | Uz       | Dz       | Lz       | (L+D)z   |
|--------------------|------------------------------------------------------------------------------|---------|------|------|------|-------|----------|----------|----------|----------|
| Il1b               | interleukin 1 beta                                                           | 0.00423 | 1.46 | 0.5  | 9.39 | 7.51  | -0.7401  | -0.95838 | 1.062968 | 0.635507 |
| Csrnp1             | cysteine-serine-rich nuclear protein 1                                       | 0.00423 | 2.43 | 2.33 | 7.41 | 6.76  | -0.84351 | -0.88014 | 0.980888 | 0.742764 |
| Mdm2               | transformed mouse 3T3 cell double minute 2                                   | 0.00423 | 4.06 | 4.03 | 5.93 | 5.36  | -0.82398 | -0.85547 | 1.138871 | 0.54057  |
| Egr3               | early growth response 3                                                      | 0.00423 | 0.81 | 0.64 | 5.01 | 4.61  | -0.82765 | -0.89952 | 0.948146 | 0.779023 |
| Ankrd57            | ankyrin repeat domain 57                                                     | 0.00423 | 2.11 | 2.02 | 4.3  | 4.1   | -0.82734 | -0.90016 | 0.944663 | 0.782836 |
| BC031781           | cDNA sequence BC031781                                                       | 0.00436 | 3.26 | 3.18 | 5.29 | 5.08  | -0.82806 | -0.89835 | 0.955459 | 0.770956 |
| Il1a               | interleukin 1 alpha                                                          | 0.00492 | 0.14 | 0.03 | 6.35 | 4.43  | -0.82151 | -0.8563  | 1.14252  | 0.535284 |
| Gpr132             | G protein-coupled receptor 132                                               | 0.00508 | 3.79 | 3.49 | 6.21 | 5.81  | -0.74812 | -0.96497 | 1.001112 | 0.711982 |
| Psd                | pleckstrin and Sec7 domain containing                                        | 0.00539 | 1.42 | 1.32 | 3.35 | 2.87  | -0.80052 | -0.89814 | 1.083628 | 0.615032 |
| Irg1               | immunoresponsive gene 1                                                      | 0.0063  | 2.34 | 2.15 | 8.78 | 8.1   | -0.83675 | -0.8897  | 0.95798  | 0.768474 |
| Nlrp3              | NLR family, pyrin domain containing 3                                        | 0.00729 | 2.94 | 2.71 | 7.38 | 7.04  | -0.81881 | -0.90946 | 0.931127 | 0.797132 |
| Ptgs2              | prostaglandin-endoperoxide synthase 2                                        | 0.00855 | 0.54 | 0.25 | 6.2  | 4.65  | -0.79675 | -0.89425 | 1.106042 | 0.584958 |
| Rel                | reticuloendotheliosis oncogene                                               | 0.00855 | 2.3  | 2.52 | 5.2  | 4.83  | -0.93282 | -0.78753 | 0.982348 | 0.737999 |
| Nupr1              | nuclear protein 1                                                            | 0.00908 | 1.78 | 1.76 | 5.43 | 5.06  | -0.8586  | -0.86854 | 0.955523 | 0.771625 |
| CT027693.1         | miR-155                                                                      | 0.01    | 0.12 | 0.05 | 4.05 | 3.12  | -0.83403 | -0.86807 | 1.077186 | 0.624914 |
| Lilrb4             | leukocyte immunoglobulin-like receptor, subfamily B, member 4                | 0.01    | 7.29 | 7.22 | 8.43 | 8.22  | -0.80085 | -0.91296 | 1.025803 | 0.688728 |
| Sod2               | superoxide dismutase 2, mitochondrial                                        | 0.01    | 4.4  | 4.31 | 6.92 | 6.56  | -0.82835 | -0.89332 | 0.990768 | 0.730895 |
| Cdkn1a             | cyclin-dependent kinase inhibitor 1A (P21)                                   | 0.01    | 6.02 | 6.17 | 8.74 | 8.23  | -0.9092  | -0.80182 | 1.038065 | 0.672952 |
| Mefv               | Mediterranean fever                                                          | 0.01    | 3.67 | 3.41 | 6.09 | 5.69  | -0.76239 | -0.95208 | 1.003151 | 0.711325 |
| Bcl2a1a            | B-cell leukemia/lymphoma 2 related protein A1a                               | 0.01    | 0.16 | 0.28 | 3.75 | 3.37  | -0.89396 | -0.83196 | 0.961141 | 0.764779 |
| Cxcl10             | chemokine (C-X-C motif) ligand 10                                            | 0.01    | 2.2  | 1.66 | 9.07 | 8.43  | -0.79447 | -0.93109 | 0.943744 | 0.781815 |
| Tpbp               | trophoblast glycoprotein                                                     | 0.01    | 0.26 | 0.27 | 1.81 | 1.19  | -0.82273 | -0.80951 | 1.225827 | 0.406406 |
| Ifnb1              | interferon beta 1, fibroblast                                                | 0.02    | 0.02 | 0    | 5.72 | 4.51  | -0.85076 | -0.85746 | 1.056553 | 0.651666 |
| Gpr84              | G protein-coupled receptor 84                                                | 0.02    | 1.76 | 1.38 | 6.17 | 4.93  | -0.76334 | -0.92449 | 1.10684  | 0.580985 |
| Tnfr3              | TNFAIP3 interacting protein 3                                                | 0.02    | 2.65 | 2.31 | 5.52 | 4.84  | -0.7424  | -0.95631 | 1.063265 | 0.635442 |
| Ripk2              | receptor (TNFRSF)-interacting serine-threonine kinase 2                      | 0.02    | 2.14 | 1.9  | 4.17 | 3.75  | -0.74736 | -0.95838 | 1.037512 | 0.668228 |
| Fam55c             | family with sequence similarity 55, member C                                 | 0.02    | 0.4  | 0.39 | 1.43 | 1.12  | -0.83077 | -0.84987 | 1.136344 | 0.544299 |
| Trib1              | tribbles homolog 1 (Drosophila)                                              | 0.02    | 3.11 | 2.79 | 5.39 | 4.82  | -0.72103 | -0.9725  | 1.070737 | 0.622796 |
| Snx18              | sorting nexin 18                                                             | 0.02    | 4.31 | 4.39 | 6.22 | 5.96  | -0.90036 | -0.82121 | 0.989404 | 0.732159 |
| Slc2a6             | solute carrier family 2 (facilitated glucose transporter), member 6          | 0.02    | 2.87 | 2.57 | 5.81 | 4.88  | -0.74178 | -0.93321 | 1.134209 | 0.540783 |
| 1110002J07Rik      | RIKEN cDNA 1110002J07 gene                                                   | 0.02    | 0.63 | 0.65 | 2.97 | 2.78  | -0.87218 | -0.85671 | 0.937935 | 0.79096  |
| Ppp1r10            | protein phosphatase 1, regulatory subunit 10(Mir 1894)                       | 0.02    | 3.4  | 3.34 | 4.44 | 4.37  | -0.81421 | -0.91442 | 0.922768 | 0.805857 |
| Zfp131 (NT_110857) | Zfp131                                                                       | 0.02    | 1.6  | 1.69 | 3.71 | 3     | -0.87413 | -0.78672 | 1.175219 | 0.485628 |
| Gm2449             | predicted gene 2449                                                          | 0.02    | 0.12 | 0.29 | 1.59 | 1.42  | -0.97101 | -0.74642 | 0.971008 | 0.746421 |
| Areg               | amphiregulin                                                                 | 0.03    | 0.05 | 0    | 2.65 | 2.21  | -0.84092 | -0.87663 | 1.015892 | 0.701662 |
| Gp49a              | glycoprotein 49 A                                                            | 0.03    | 3.74 | 3.82 | 5.28 | 4.96  | -0.90413 | -0.80226 | 1.056946 | 0.649449 |
| Myc                | myelocytomatosis oncogene                                                    | 0.03    | 2.2  | 2.01 | 5.03 | 4.6   | -0.79932 | -0.91985 | 0.995974 | 0.723191 |
| Clcf1              | cardiotrophin-like cytokine factor 1                                         | 0.03    | 0.86 | 0.56 | 3.53 | 2.75  | -0.73761 | -0.94539 | 1.111612 | 0.571389 |
| Gja1               | gap junction protein, alpha 1                                                | 0.03    | 1.88 | 1.93 | 4.28 | 3.52  | -0.85705 | -0.81514 | 1.154608 | 0.517583 |
| Ppp1r15a           | protein phosphatase 1, regulatory (inhibitor) subunit 15A                    | 0.03    | 2.85 | 2.83 | 7.74 | 7.45  | -0.86158 | -0.86886 | 0.917986 | 0.812449 |
| Ccl5               | chemokine (C-C motif) ligand 5                                               | 0.03    | 2.87 | 3.2  | 8.08 | 7.68  | -0.92237 | -0.80474 | 0.93485  | 0.792261 |
| Mapkapk2           | MAP kinase-activated protein kinase 2                                        | 0.03    | 6.8  | 6.63 | 8.54 | 7.87  | -0.729   | -0.91677 | 1.192903 | 0.452861 |
| Ncrna00085         | non-protein coding RNA 85, mir-125a                                          | 0.03    | 1.16 | 1.34 | 2.61 | 2.19  | -0.96424 | -0.70324 | 1.138239 | 0.529245 |
| 2500002B13Rik      | RIKEN cDNA 2500002B13 gene                                                   | 0.04    | 0.52 | 0.48 | 2.08 | 1.85  | -0.83708 | -0.88408 | 0.995687 | 0.725471 |
| Ch25h              | cholesterol 25-hydroxylase                                                   | 0.04    | 0.25 | 0.14 | 2.76 | 1.93  | -0.79223 | -0.87767 | 1.157278 | 0.51262  |
| Mmd                | monocyte to macrophage differentiation-associated                            | 0.04    | 3.66 | 3.61 | 4.84 | 4.74  | -0.8266  | -0.90141 | 0.938809 | 0.789198 |
| AC124475.1         |                                                                              | 0.04    | 0.52 | 0.54 | 2.62 | 2.44  | -0.8729  | -0.85561 | 0.942038 | 0.786472 |
| Malt1              | mucosa associated lymphoid tissue lymphoma translocation gene 1              | 0.04    | 1.98 | 1.97 | 4.26 | 3.44  | -0.82295 | -0.83178 | 1.189196 | 0.465529 |
| Rnf19a             | ring finger protein 19A                                                      | 0.04    | 3.42 | 3.19 | 4.67 | 4.19  | -0.65338 | -0.98919 | 1.171699 | 0.47087  |
| Plek               | pleckstrin                                                                   | 0.05    | 5.8  | 5.63 | 8.22 | 7.83  | -0.79557 | -0.92197 | 1.003761 | 0.713786 |
| Il1f9              | interleukin 1 family, member 9                                               | 0.05    | 1.19 | 1    | 3.01 | 2.27  | -0.71696 | -0.91802 | 1.20904  | 0.425942 |
| Traf1              | TNF receptor-associated factor 1                                             | 0.06    | 1.5  | 1.42 | 4.48 | 3.91  | -0.83154 | -0.88165 | 1.035115 | 0.678071 |
| Rela               | v-rel reticuloendotheliosis viral oncogene homolog A (avian)                 | 0.06    | 5.37 | 5.27 | 6.43 | 6.11  | -0.75181 | -0.92871 | 1.123293 | 0.557224 |
| Rab11fip1          | RAB11 family interacting protein 1 (class I)                                 | 0.06    | 1.55 | 1.39 | 4.17 | 3.34  | -0.77917 | -0.8965  | 1.14217  | 0.533502 |
| Oas1               | 2'-5' oligoadenylate synthetase-like 1                                       | 0.06    | 2.16 | 2.07 | 5.05 | 4.74  | -0.83518 | -0.89106 | 0.959368 | 0.766874 |
| Il6                | interleukin 6                                                                | 0.06    | 0.07 | 0.02 | 3.91 | 3.55  | -0.8522  | -0.87565 | 0.948327 | 0.779527 |
| Tnfsf4             | tumor necrosis factor (ligand) superfamily, member 4                         | 0.06    | 0.35 | 0.28 | 2.93 | 1.87  | -0.78741 | -0.84212 | 1.228981 | 0.400542 |
| Pip5k1a            | phosphatidylinositol-4-phosphate 5-kinase, type 1 alpha                      | 0.06    | 2.78 | 2.64 | 3.54 | 3.24  | -0.65027 | -0.98745 | 1.180123 | 0.457599 |
| H2-Q7              | histocompatibility 2, Q region locus 7                                       | 0.07    | 3.62 | 3.52 | 5.46 | 5.06  | -0.80292 | -0.90392 | 1.055412 | 0.651427 |
| Tmem200b           | transmembrane protein 200B                                                   | 0.07    | 0.02 | 0.03 | 2.6  | 2.05  | -0.85761 | -0.85019 | 1.058094 | 0.649707 |
| Orm2               | orosomucoid 2                                                                | 0.07    | 0.3  | 0.34 | 1.12 | 0.9   | -0.89308 | -0.79521 | 1.113294 | 0.574998 |
| Trem1              | triggering receptor expressed on myeloid cells 1                             | 0.07    | 0.88 | 0.76 | 2.55 | 2.35  | -0.79819 | -0.92506 | 0.967347 | 0.755905 |
| Nr4a1              | nuclear receptor subfamily 4, group A, member 1                              | 0.07    | 2.87 | 3.25 | 6.73 | 6.32  | -0.95481 | -0.76608 | 0.962258 | 0.758631 |
| Hspa1a             | heat shock protein 1A                                                        | 0.07    | 0.75 | 0.83 | 3.75 | 2.65  | -0.85131 | -0.79661 | 1.200039 | 0.447878 |
| Osgin2             | oxidative stress induced growth inhibitor family member 2                    | 0.08    | 0.79 | 0.78 | 1.8  | 1.58  | -0.84405 | -0.86291 | 1.060959 | 0.646006 |
| Tnfr1              | TNFAIP3 interacting protein 1                                                | 0.08    | 4.84 | 4.76 | 6.67 | 6.34  | -0.81733 | -0.8978  | 1.023544 | 0.691584 |
| Ifitm1             | interferon induced transmembrane protein 1                                   | 0.08    | 3.23 | 3.16 | 4.08 | 3.92  | -0.78158 | -0.93045 | 1.026151 | 0.685873 |
| Dyrk2              | dual-specificity tyrosine-(Y)-phosphorylation regulated kinase 2             | 0.08    | 3.67 | 3.5  | 5.21 | 4.95  | -0.75939 | -0.95426 | 1.005839 | 0.707813 |
| H2-Q8              |                                                                              | 0.08    | 1.65 | 1.41 | 3.46 | 3.12  | -0.73769 | -0.97065 | 1.019177 | 0.689158 |
| Cdc42ep4           | CDC42 effector protein (Rho GTPase binding) 4                                | 0.08    | 2.92 | 2.57 | 5.9  | 4.98  | -0.72961 | -0.94741 | 1.124757 | 0.552267 |
| Dcun1d3            | DCN1, defective in cullin neddylation 1, domain containing 3 (S. cerevisiae) | 0.08    | 1.26 | 1.46 | 2.36 | 2.05  | -1.02335 | -0.63163 | 1.131067 | 0.523914 |
| Rnd1               | Rho family GTPase 1                                                          | 0.09    | 0.78 | 0.77 | 4.51 | 3.79  | -0.8538  | -0.85887 | 1.03902  | 0.67365  |

|              |                                                                              |        |        |        |        |          |          |          |          |          |
|--------------|------------------------------------------------------------------------------|--------|--------|--------|--------|----------|----------|----------|----------|----------|
| Atrip        | ATR interacting protein                                                      | 0.09   | 4.44   | 4.26   | 6.02   | 5.6      | -0.74132 | -0.94981 | 1.088811 | 0.602321 |
| Zswim4       | zinc finger, SWIM domain containing 4                                        | 0.09   | 3.57   | 3.22   | 6.24   | 5.67     | -0.73518 | -0.96804 | 1.04123  | 0.661996 |
| Gm16912      |                                                                              | 0.09   | 0.2    | 0.01   | 1.63   | 1.2      | -0.71767 | -0.96117 | 1.114957 | 0.563886 |
| Baz1a        | bromodomain adjacent to zinc finger domain 1A                                | 0.1    | 2.48   | 2.46   | 3.6    | 3.33     | -0.83333 | -0.86752 | 1.081197 | 0.619658 |
| Arl5b        | ADP-ribosylation factor-like 5B                                              | 0.1    | 1.02   | 1.01   | 2.36   | 2.04     | -0.84346 | -0.85782 | 1.080351 | 0.620932 |
| Stx11        | syntaxin 11                                                                  | 0.1    | 2.4    | 2.25   | 4.62   | 4.13     | -0.79041 | -0.91521 | 1.056647 | 0.648964 |
| Klf6         | Kruppel-like factor 6                                                        | 0.1    | 5.13   | 5.22   | 7.58   | 7.3      | -0.89667 | -0.82813 | 0.969008 | 0.755788 |
| Adora2a      | adenosine A2a receptor                                                       | 0.1    | 0.88   | 0.79   | 3.51   | 3.37     | -0.83525 | -0.89503 | 0.911638 | 0.818648 |
| RP24-143P3.1 |                                                                              | 0.1    | 3.36   | 3.21   | 5.09   | 4.41     | -0.73685 | -0.90495 | 1.201931 | 0.439867 |
| Zfp263       | zinc finger protein 263                                                      | 0.1    | 3.84   | 3.59   | 5.42   | 4.82     | -0.67664 | -0.96956 | 1.174605 | 0.4716   |
| Nfkb2        | nuclear factor of kappa light polypeptide gene enhancer in B-cells 2, p49/p1 | 0.11   | 5.14   | 4.95   | 6.72   | 6.38     | -0.74433 | -0.95943 | 1.04433  | 0.659428 |
| Spata13      | spermatogenesis associated 13                                                | 0.11   | 1.3    | 1.28   | 2.87   | 2.38     | -0.82565 | -0.85077 | 1.145866 | 0.530552 |
| Kctd12       | potassium channel tetramerisation domain containing 12                       | 0.11   | 5.89   | 5.88   | 7.41   | 6.9      | -0.82652 | -0.83964 | 1.167621 | 0.498535 |
| AC102815.1   |                                                                              | 0.11   | 5.92   | 5.87   | 7.42   | 6.9      | -0.79845 | -0.86417 | 1.173031 | 0.489584 |
| Zfp36        | zinc finger protein 36                                                       | 0.11   | 6.1    | 6.11   | 9.33   | 9.08     | -0.86741 | -0.86183 | 0.934346 | 0.794891 |
| Il27         | interleukin 27                                                               | 0.11   | 0.73   | 0.98   | 3.76   | 3.5      | -0.94008 | -0.7847  | 0.943191 | 0.78159  |
| Itga5        | integrin alpha 5 (fibronectin receptor alpha)                                | 0.11   | 4.31   | 5.02   | 7.47   | 6.83     | -1.07443 | -0.5969  | 1.050887 | 0.620444 |
|              | Cluster average                                                              | 2.4082 | 2.3283 | 5.0134 | 4.4942 | -0.82011 | -0.87799 | 1.053579 | 0.644517 |          |
|              | Cluster SD                                                                   | 1.8186 | 1.8264 | 2.0545 | 2.0082 | 0.074362 | 0.070774 | 0.087638 | 0.115168 |          |

### Cluster 5

| Feature ID | Name                                                                     | FDR, P  | U      | D      | L      | (L+D)    | Uz       | Dz       | Lz       | (L+D)z   |
|------------|--------------------------------------------------------------------------|---------|--------|--------|--------|----------|----------|----------|----------|----------|
| Csf2       | colony stimulating factor 2 (granulocyte-macrophage)                     | 0.00291 | 0      | 0      | 1.12   | 0.1      | -0.55925 | -0.55925 | 1.494386 | -0.37589 |
| Arih2      | ariadne homolog 2 (Drosophila)                                           | 0.00423 | 3.75   | 3.65   | 4.69   | 4.25     | -0.69616 | -0.90396 | 1.257238 | 0.342883 |
| Dusp8      | dual specificity phosphatase 8                                           | 0.00492 | 0.23   | 0.1    | 1.63   | 1.04     | -0.72311 | -0.90388 | 1.223718 | 0.403271 |
| Ralgds     | ral guanine nucleotide dissociation stimulator                           | 0.00589 | 4.34   | 3.8    | 5.64   | 4.82     | -0.39717 | -1.08903 | 1.268397 | 0.217806 |
| Etv3       | ets variant gene 3                                                       | 0.00661 | 3.49   | 2.73   | 5.08   | 4.13     | -0.36904 | -1.13221 | 1.22761  | 0.273639 |
| Stk35      | serine/threonine kinase 35                                               | 0.01    | 2.51   | 2.31   | 3.36   | 2.96     | -0.58519 | -1.01079 | 1.223589 | 0.372397 |
| Irgq       | immunity-related GTPase family, Q                                        | 0.01    | 2.33   | 2.32   | 3.45   | 2.95     | -0.79376 | -0.81211 | 1.261751 | 0.344114 |
| Brd2       | bromodomain containing 2                                                 | 0.01    | 4.84   | 4.53   | 5.6    | 5.09     | -0.38692 | -1.07232 | 1.293417 | 0.165823 |
| Sqstm1     | sequestosome 1                                                           | 0.02    | 7.47   | 7.15   | 8.97   | 8.14     | -0.5743  | -0.97165 | 1.28829  | 0.257658 |
| Niacr1     | nicotin receptor 1                                                       | 0.02    | 0.79   | 0.48   | 3.85   | 2.27     | -0.68371 | -0.88414 | 1.294689 | 0.273162 |
| Olr1       | oxidized low density lipoprotein (lectin-like) receptor 1                | 0.02    | 0.26   | 0.17   | 3.63   | 1.83     | -0.74487 | -0.80016 | 1.325402 | 0.219621 |
| Il12b      | interleukin 12b                                                          | 0.02    | 0.14   | 0.11   | 3.34   | 1.56     | -0.75174 | -0.77139 | 1.344611 | 0.178517 |
| Lif        | leukemia inhibitory factor                                               | 0.02    | 0.25   | 0.1    | 2.84   | 1.08     | -0.64994 | -0.76919 | 1.409193 | 0.009938 |
| Serpinb2   | serine (or cysteine) peptidase inhibitor, clade B, member 2              | 0.02    | 1.23   | 1.27   | 3.8    | 2.58     | -0.80756 | -0.77493 | 1.288834 | 0.293658 |
| Il1rn      | interleukin 1 receptor antagonist                                        | 0.02    | 3.83   | 3.92   | 6.01   | 5.03     | -0.84123 | -0.75396 | 1.272758 | 0.322432 |
| Tmem39a    | transmembrane protein 39a                                                | 0.02    | 1.6    | 1.58   | 2.64   | 1.9      | -0.66607 | -0.70643 | 1.433052 | -0.06055 |
| Mxd1       | MAX dimerization protein 1                                               | 0.03    | 2.96   | 2.59   | 5.48   | 4.11     | -0.63354 | -0.91767 | 1.301627 | 0.249575 |
| Mybpc3     | myosin binding protein C, cardiac                                        | 0.03    | 0.31   | 0.32   | 1.25   | 0.85     | -0.81921 | -0.79722 | 1.248057 | 0.368369 |
| Orai2      | ORAI calcium release-activated calcium modulator 2                       | 0.04    | 3.53   | 3.14   | 5.48   | 4.36     | -0.57713 | -0.95384 | 1.306397 | 0.224575 |
| Ets1       | E26 avian leukemia oncogene 1, 5' domain                                 | 0.04    | 1.54   | 1.29   | 2.58   | 1.87     | -0.50037 | -0.94713 | 1.358154 | 0.089352 |
| Vasp       | vasodilator-stimulated phosphoprotein                                    | 0.04    | 6.2    | 6.11   | 6.96   | 6.62     | -0.69209 | -0.92068 | 1.238151 | 0.37462  |
| Med21      | mediator complex subunit 21                                              | 0.05    | 3.23   | 3.01   | 4.22   | 3.49     | -0.48929 | -0.90733 | 1.391876 | 0.00475  |
| Vash1      | vasohibin 1                                                              | 0.05    | 0.76   | 0.68   | 2.22   | 1.24     | -0.65684 | -0.76985 | 1.405504 | 0.021188 |
| Foxn2      | forkhead box N2                                                          | 0.06    | 2.57   | 2.33   | 3.65   | 2.91     | -0.51314 | -0.93061 | 1.365476 | 0.078276 |
| Ccr3       | chemokine (C-C motif) receptor 3                                         | 0.06    | 1.38   | 1.31   | 2.29   | 1.64     | -0.61589 | -0.77267 | 1.422157 | -0.03359 |
| Zfp295     | zinc finger protein 295                                                  | 0.06    | 2.09   | 1.81   | 2.71   | 2.31     | -0.36859 | -1.10577 | 1.263741 | 0.210624 |
| Arl5c      | ADP-ribosylation factor-like 5C                                          | 0.07    | 4.3    | 3.91   | 6.92   | 5.59     | -0.64507 | -0.93096 | 1.275487 | 0.300546 |
| Il17ra     | interleukin 17 receptor A                                                | 0.07    | 4.12   | 3.83   | 5.24   | 4.61     | -0.53463 | -1.00445 | 1.279866 | 0.259213 |
| Fam43a     | family with sequence similarity 43, member A                             | 0.07    | 3.36   | 3.11   | 4.88   | 4.16     | -0.64325 | -0.95401 | 1.246111 | 0.351148 |
| Cass4      | Cas scaffolding protein family member 4                                  | 0.07    | 0.44   | 0.2    | 1.06   | 0.78     | -0.47655 | -1.11196 | 1.164907 | 0.423603 |
| Spata2     | spermatogenesis associated 2                                             | 0.08    | 3.33   | 3.07   | 4.16   | 3.62     | -0.45988 | -1.01602 | 1.315477 | 0.160424 |
| Stk40      | serine/threonine kinase 40                                               | 0.08    | 4.05   | 3.46   | 5.62   | 4.74     | -0.44917 | -1.08392 | 1.239922 | 0.29317  |
| Mmp13      | matrix metalloproteinase 13                                              | 0.08    | 2.46   | 2.38   | 4.73   | 3.1      | -0.64887 | -0.72224 | 1.433009 | -0.06191 |
| Nr4a3      | nuclear receptor subfamily 4, group A, member 3                          | 0.08    | 0.17   | 0.13   | 1.07   | 0.4      | -0.62655 | -0.71852 | 1.442783 | -0.09772 |
| Mrpl23-ps1 | mitochondrial ribosomal protein L23, pseudogene 1                        | 0.08    | 1.52   | 1.62   | 3.14   | 2.11     | -0.77906 | -0.64416 | 1.406357 | 0.016863 |
| Klf7       | Kruppel-like factor 7 (ubiquitous)                                       | 0.09    | 2      | 1.8    | 3.57   | 2.76     | -0.66078 | -0.90896 | 1.28743  | 0.282304 |
| Hspa1b     | heat shock protein 1B                                                    | 0.1     | 1.41   | 1.19   | 4.95   | 3.28     | -0.73524 | -0.8599  | 1.270729 | 0.324411 |
| Asprv1     | aspartic peptidase, retroviral-like 1                                    | 0.1     | 1.47   | 1.39   | 2.9    | 2.25     | -0.74675 | -0.85894 | 1.258614 | 0.347083 |
| Plekhg2    | pleckstrin homology domain containing, family G (with RhoGef domain) mer | 0.1     | 2.29   | 2.27   | 3.12   | 2.75     | -0.77953 | -0.82863 | 1.258292 | 0.349867 |
| AI504432   | expressed sequence AI504432, KCNA3 associate                             | 0.1     | 0.3    | 0.26   | 1.65   | 0.67     | -0.64926 | -0.71109 | 1.437648 | -0.07729 |
| Rap2b      | RAP2B, member of RAS oncogene family                                     | 0.1     | 5.41   | 5.01   | 6.54   | 6.01     | -0.49481 | -1.09006 | 1.18679  | 0.398077 |
| Bcl2l11    | BCL2-like 11 (apoptosis facilitator)                                     | 0.11    | 4.31   | 3.9    | 5.53   | 5        | -0.51836 | -1.08509 | 1.168029 | 0.435419 |
| G0s2       | G0/G1 switch gene 2                                                      | 0.11    | 1.38   | 1.13   | 3.3    | 1.26     | -0.3774  | -0.62089 | 1.492567 | -0.49428 |
|            | Cluster average                                                          | 2.4174  | 2.2202 | 3.9737 | 3.0749 | -0.61212 | -0.88577 | 1.310979 | 0.18691  |          |
|            | Cluster SD                                                               | 1.802   | 1.7166 | 1.79   | 1.8173 | 0.133502 | 0.145779 | 0.084979 | 0.207125 |          |

### Cluster 6

| Feature ID         | Name                                                                         | FDR, P  | U    | D    | L    | (L+D) | Uz       | Dz       | Lz       | (L+D)z   |
|--------------------|------------------------------------------------------------------------------|---------|------|------|------|-------|----------|----------|----------|----------|
| Fbxl22             | F-box and leucine-rich repeat protein 22                                     | 0.00423 | 0.09 | 0.25 | 0.51 | 1.06  | -0.91143 | -0.5351  | 0.076442 | 1.370083 |
| Pfkfb3             | 6-phosphofructo-2-kinase/fructose-2,6-biphosphatase 3                        | 0.00492 | 4.18 | 5.91 | 4.51 | 7.44  | -0.89305 | 0.268587 | -0.67147 | 1.295935 |
| D10Wsu102e         | DNA segment, Chr 10, Wayne State University 102, expressed                   | 0.00954 | 3.16 | 3.59 | 3.12 | 5.18  | -0.622   | -0.17808 | -0.66329 | 1.46337  |
| Hspa14 (2 3406121. |                                                                              | 0.01    | 2.32 | 2.74 | 2.47 | 3.35  | -0.88002 | 0.044001 | -0.55002 | 1.386039 |
| Slc10a6            | solute carrier family 10 (sodium/bile acid cotransporter family), member 6   | 0.02    | 0.05 | 0.28 | 0.03 | 1.12  | -0.62414 | -0.17554 | -0.66315 | 1.462829 |
| Htr2a              | 5-hydroxytryptamine (serotonin) receptor 2A                                  | 0.02    | 0.11 | 0.73 | 0.28 | 1.27  | -0.93919 | 0.255268 | -0.61168 | 1.295607 |
| Mt2                | metallothionein 2                                                            | 0.02    | 6.87 | 7.81 | 7.78 | 10.41 | -0.88339 | -0.26715 | -0.28682 | 1.437355 |
| Glipr1             | GLI pathogenesis-related 1 (glioma)                                          | 0.02    | 7.4  | 7.44 | 7.9  | 8.87  | -0.73494 | -0.67643 | -0.00366 | 1.415025 |
| Steap4             | STEAP family member 4                                                        | 0.03    | 0.09 | 0.09 | 0.56 | 1.71  | -0.68347 | -0.68347 | -0.06867 | 1.435622 |
| Pik3r1             | phosphatidylinositol 3-kinase, regulatory subunit, polypeptide 1 (p85 alpha) | 0.03    | 4.02 | 4.76 | 4.35 | 5.21  | -1.09707 | 0.3398   | -0.4563  | 1.213573 |
| Rnf103             | ring finger protein 103                                                      | 0.04    | 2.88 | 3.75 | 3.59 | 4.9   | -1.07535 | -0.03584 | -0.22702 | 1.33821  |
| Rnf149             | ring finger protein 149                                                      | 0.05    | 5.89 | 6.29 | 6.32 | 6.99  | -1.05823 | -0.18094 | -0.11514 | 1.354311 |

|               |                                                    |      |        |        |        |        |          |          |          |          |
|---------------|----------------------------------------------------|------|--------|--------|--------|--------|----------|----------|----------|----------|
| Hs6st1        | heparan sulfate 6-O-sulfotransferase 1             | 0.06 | 3.9    | 4.08   | 3.88   | 4.79   | -0.61347 | -0.19281 | -0.66021 | 1.466491 |
| Saa1          | serum amyloid A 1                                  | 0.07 | 0      | 0.03   | 0.06   | 1      | -0.56114 | -0.49936 | -0.43759 | 1.498091 |
| 6330409N04Rik | RIKEN cDNA 6330409N04 gene                         | 0.06 | 1.93   | 3.02   | 2.89   | 4.14   | -1.17684 | 0.027625 | -0.11603 | 1.265238 |
| Edn1          | endothelin 1                                       | 0.06 | 0.08   | 0.1    | 0.54   | 2.06   | -0.65815 | -0.63675 | -0.16588 | 1.460778 |
| S100a10       | S100 calcium binding protein A10 (calpactin)       | 0.08 | 5.83   | 6.12   | 6.03   | 6.94   | -0.81866 | -0.22513 | -0.40933 | 1.453121 |
| Prdx6         | peroxiredoxin 6                                    | 0.08 | 4.79   | 5.13   | 4.87   | 6.37   | -0.68075 | -0.21784 | -0.57183 | 1.47042  |
| Arc           | activity regulated cytoskeletal-associated protein | 0.08 | 0.54   | 0.86   | 1.04   | 2.21   | -0.85473 | -0.41535 | -0.1682  | 1.438275 |
| Gm16556       | predicted gene 16556                               | 0.09 | 0.93   | 1.24   | 1.12   | 1.92   | -0.86428 | -0.14501 | -0.42344 | 1.432725 |
| Map3k6        | mitogen-activated protein kinase kinase kinase 6   | 0.09 | 0.82   | 2.13   | 1.59   | 3.27   | -1.09976 | 0.172369 | -0.35202 | 1.279413 |
| Med7          | mediator complex subunit 7                         | 0.11 | 1.79   | 2.04   | 2.16   | 2.99   | -0.87495 | -0.39421 | -0.16345 | 1.432604 |
| Glrx          | glutaredoxin                                       | 0.11 | 6.84   | 7.1    | 7.18   | 7.75   | -0.98429 | -0.30637 | -0.09778 | 1.388435 |
|               | Cluster average                                    |      | 2.8048 | 3.2822 | 3.1643 | 4.3891 | -0.85171 | -0.20251 | -0.33941 | 1.393633 |
|               | Cluster SD                                         |      | 2.5292 | 2.6268 | 2.5768 | 2.7521 | 0.179467 | 0.29801  | 0.238759 | 0.078437 |

### Cluster 7

| Feature ID    | Name                                                              | FDR, P  | U      | D      | L      | (L+D)  | Uz       | Dz       | Lz       | (L+D)z   |
|---------------|-------------------------------------------------------------------|---------|--------|--------|--------|--------|----------|----------|----------|----------|
| Cytip         | cytohesin 1 interacting protein                                   | 0.04    | 2.78   | 4.05   | 2.72   | 4.21   | -0.82521 | 0.762699 | -0.90023 | 0.962751 |
| Adrb2         | adrenergic receptor, beta 2                                       | 0.03    | 2.97   | 4.4    | 2.97   | 4.71   | -0.85786 | 0.690077 | -0.85786 | 1.025644 |
| Zfp217        | zinc finger protein 217                                           | 0.02    | 4.15   | 4.71   | 4.06   | 4.88   | -0.73885 | 0.640335 | -0.9605  | 1.059015 |
| Il15ra        | interleukin 15 receptor, alpha chain                              | 0.02    | 0.71   | 2.46   | 0.88   | 2.58   | -0.94793 | 0.802865 | -0.77785 | 0.922919 |
| Fkbp5         | FK506 binding protein 5                                           | 0.05    | 1.64   | 4.31   | 1.61   | 3.98   | -0.85204 | 0.975227 | -0.87257 | 0.749385 |
| Tm6sf1        | transmembrane 6 superfamily member 1                              | 0.08    | 4.78   | 5.36   | 4.71   | 5.57   | -0.76398 | 0.599433 | -0.92853 | 1.093084 |
| B4galt1       | UDP-Gal:betaGlcNAc beta 1,4- galactosyltransferase, polypeptide 1 | 0.06    | 5.28   | 6.16   | 5.07   | 6.04   | -0.65826 | 0.962068 | -1.04493 | 0.741115 |
| Btbd1         | BTB (POZ) domain containing 1                                     | 0.06    | 4.44   | 5.01   | 4.19   | 5.12   | -0.55911 | 0.817561 | -1.11822 | 0.96167  |
| 1700029F09Rik | RIKEN cDNA 1700029F09 gene                                        | 0.09    | 0.96   | 2.59   | 1.21   | 2.61   | -1.00209 | 0.848797 | -0.71821 | 0.871508 |
| Per1          | period homolog 1 (Drosophila)                                     | 0.08    | 2.54   | 5.35   | 2.97   | 5.34   | -1.00291 | 0.863436 | -0.71732 | 0.856795 |
| Kcnk6         | potassium inwardly-rectifying channel, subfamily K, member 6      | 0.04    | 3.46   | 4.77   | 3.27   | 4.49   | -0.72313 | 1.039287 | -0.97875 | 0.662588 |
| E130208F15Rik | RIKEN cDNA E130208F15 gene                                        | 0.11    | 2.61   | 3.17   | 2.42   | 3.43   | -0.63043 | 0.556259 | -1.03305 | 1.107221 |
| Klf9          | Kruppel-like factor 9 (mir1192)                                   | 0.06    | 1.51   | 3.3    | 1.28   | 2.87   | -0.73306 | 1.064444 | -0.96403 | 0.632642 |
| Prss16        | protease, serine, 16 (thymus)                                     | 0.02    | 0.28   | 1.96   | 0.4    | 2.64   | -0.89179 | 0.548795 | -0.78889 | 1.131891 |
| Klf4          | Kruppel-like factor 4 (gut)                                       | 0.04    | 1.49   | 4.32   | 1.69   | 3.79   | -0.92417 | 1.038606 | -0.78546 | 0.671019 |
| Tigd2         | tigger transposable element derived 2                             | 0.08    | 2.47   | 4.83   | 2.25   | 4.23   | -0.76188 | 1.082262 | -0.93379 | 0.613412 |
| Gpr31c        | G protein-coupled receptor 31, D17Leh66c region                   | 0.03    | 2.09   | 2.97   | 2.18   | 3.33   | -0.91281 | 0.541076 | -0.76411 | 1.135847 |
| Ncoa5         | nuclear receptor coactivator 5                                    | 0.04    | 2.93   | 3.87   | 3.12   | 3.83   | -1.05102 | 0.895696 | -0.65753 | 0.812857 |
| Lyve1         | lymphatic vessel endothelial hyaluronan receptor 1                | 0.08    | 0.04   | 1.03   | 0.04   | 1.54   | -0.83183 | 0.491082 | -0.83183 | 1.172583 |
| Gm11707       | predicted gene 11707                                              | 0.06    | 0.33   | 0.82   | 0.12   | 1.11   | -0.58686 | 0.498281 | -1.05193 | 1.140509 |
| Tgfb3         | transforming growth factor, beta 3                                | 0.03    | 0.77   | 2.5    | 0.65   | 2.01   | -0.77829 | 1.111447 | -0.90937 | 0.576205 |
| Dnajb13       | DnaJ (Hsp40) related, subfamily B, member 13                      | 0.11    | 1.15   | 2.42   | 0.69   | 2.09   | -0.5437  | 1.034587 | -1.11537 | 0.624481 |
| Pex11a        | peroxisomal biogenesis factor 11 alpha                            | 0.02    | 1.64   | 3.14   | 1.4    | 2.67   | -0.6913  | 1.119972 | -0.98111 | 0.552439 |
| Mmp19         | matrix metalloproteinase 19                                       | 0.03    | 4.04   | 4.86   | 3.58   | 4.71   | -0.43164 | 0.942896 | -1.20272 | 0.691457 |
| Thbd          | thrombomodulin                                                    | 0.08    | 2.25   | 3.15   | 1.61   | 3.1    | -0.376   | 0.843459 | -1.24317 | 0.775711 |
| Ccl17         | chemokine (C-C motif) ligand 17                                   | 0.00713 | 0      | 1.04   | 0.04   | 1.74   | -0.83812 | 0.398255 | -0.79057 | 1.230429 |
| 1700017B05Rik | RIKEN cDNA 1700017B05 gene                                        | 0.03    | 4.38   | 5.64   | 3.23   | 5.95   | -0.33665 | 0.673301 | -1.25843 | 0.921781 |
| Fzd4          | frizzled homolog 4 (Drosophila)                                   | 0.01    | 0.04   | 1.1    | 0.06   | 1.88   | -0.81993 | 0.370654 | -0.79747 | 1.246745 |
| Elf2          | E74-like factor 2                                                 | 0.03    | 4.18   | 4.58   | 3.76   | 4.72   | -0.30078 | 0.624705 | -1.27255 | 0.948627 |
| Tsc22d3       | TSC22 domain family, member 3                                     | 0.01    | 3.89   | 7.22   | 2.02   | 6.15   | -0.39979 | 1.03172  | -1.20367 | 0.571745 |
| RP23-71J17.1  | LOC67647<***>4930523C07Rik                                        | 0.03    | 0.59   | 1.23   | 0.83   | 1.48   | -1.1108  | 0.495781 | -0.50833 | 1.123352 |
| Klf2          | Kruppel-like factor 2 (lung)                                      | 0.01    | 3.75   | 5.49   | 4.51   | 5.46   | -1.2585  | 0.822057 | -0.34975 | 0.786186 |
|               | Cluster average                                                   |         | 2.3169 | 3.6816 | 2.1731 | 3.6956 | -0.7544  | 0.783913 | -0.91619 | 0.886675 |
|               | Cluster SD                                                        |         | 1.5834 | 1.6596 | 1.4963 | 1.4851 | 0.230007 | 0.227635 | 0.213177 | 0.216226 |

### Cluster 8

| Feature ID    | Name                                                             | FDR, P  | U      | D      | L      | (L+D)  | Uz       | Dz       | Lz       | (L+D)z   |
|---------------|------------------------------------------------------------------|---------|--------|--------|--------|--------|----------|----------|----------|----------|
| Rrad          | Ras-related associated with diabetes                             | 0.0023  | 3.82   | 3.04   | 4.54   | 4.15   | -0.10596 | -1.33036 | 1.024262 | 0.412059 |
| Ltb           | lymphotoxin B                                                    | 0.00477 | 3.75   | 3.18   | 4.05   | 3.47   | 0.368506 | -1.15912 | 1.172518 | -0.38191 |
| Rilpl2        | Rab interacting lysosomal protein-like 2                         | 0.02    | 6.93   | 6.44   | 7.53   | 6.79   | 0.016505 | -1.06181 | 1.336888 | -0.29158 |
| Gadd45a       | growth arrest and DNA-damage-inducible 45 alpha                  | 0.02    | 3.81   | 3.24   | 5.14   | 3.57   | -0.15598 | -0.83991 | 1.439839 | -0.44395 |
| Egr2          | early growth response 2                                          | 0.02    | 2.11   | 0.52   | 5.98   | 4.03   | -0.44395 | -1.11622 | 1.192328 | 0.367846 |
| Enc1          | ectodermal-neural cortex 1                                       | 0.03    | 3.53   | 1.72   | 2.79   | 2.1    | 1.247492 | -1.02181 | 0.319709 | -0.54539 |
| B4galt5       | UDP-Gal:betaGlcNAc beta 1,4-galactosyltransferase, polypeptide 5 | 0.04    | 4.96   | 4.25   | 6.06   | 4.83   | -0.08599 | -1.02528 | 1.36925  | -0.25797 |
| Bcl3          | B-cell leukemia/lymphoma 3                                       | 0.04    | 4.6    | 3.35   | 6.07   | 5.5    | -0.23609 | -1.29005 | 1.003371 | 0.522765 |
| Lfng          | LFNG O-fucosylpeptide 3-beta-N-acetylglucosaminyltransferase     | 0.05    | 6.25   | 5.13   | 5.89   | 4.87   | 1.110564 | -0.62906 | 0.551399 | -1.0329  |
| Hk2           | hexokinase 2                                                     | 0.04    | 3.97   | 3.85   | 4.44   | 3.47   | 0.093782 | -0.20632 | 1.26918  | -1.15664 |
| Plekho2       | pleckstrin homology domain containing, family O member 2         | 0.06    | 7      | 6.44   | 7.45   | 7.1    | 0.00597  | -1.33132 | 1.080576 | 0.244771 |
| Ptafr         | platelet-activating factor receptor                              | 0.07    | 6.07   | 5.51   | 6.76   | 6.23   | -0.1409  | -1.22924 | 1.200085 | 0.170053 |
| Atf3          | activating transcription factor 3                                | 0.07    | 6.78   | 5.48   | 8.06   | 7.5    | -0.15706 | -1.32382 | 0.991746 | 0.489142 |
| Ier3          | immediate early response 3                                       | 0.07    | 4.16   | 1.81   | 7.12   | 5.84   | -0.2495  | -1.27365 | 1.040489 | 0.482656 |
| Nr1d1         | nuclear receptor subfamily 1, group D, member 1                  | 0.07    | 3.43   | 2.42   | 3.68   | 2.36   | 0.67205  | -0.8116  | 1.03929  | -0.89974 |
| Arl4c         | ADP-ribosylation factor-like 4C                                  | 0.06    | 5.75   | 4.73   | 5.37   | 4.61   | 1.17815  | -0.71431 | 0.473115 | -0.93695 |
| Bhlhe40       | basic helix-loop-helix family, member e40                        | 0.08    | 2.19   | 1.5    | 2.92   | 2.16   | -0.00431 | -1.19357 | 1.253891 | -0.05602 |
| Neurl3        | neuronalized homolog 3 homolog (Drosophila)                      | 0.1     | 6.72   | 6.33   | 7.25   | 6.88   | -0.19671 | -1.21961 | 1.193381 | 0.222939 |
| P2ry13        | purinergic receptor P2Y, G-protein coupled 13                    | 0.1     | 1.08   | 0.39   | 1.25   | 1      | 0.400225 | -1.44081 | 0.853814 | 0.186772 |
| Sertad1       | SERTA domain containing 1                                        | 0.1     | 4.35   | 3.37   | 4.81   | 4.77   | 0.037325 | -1.4258  | 0.724096 | 0.664376 |
| 4930471M23Rik | RIKEN cDNA 4930471M23 gene                                       | 0.11    | 5.81   | 5.15   | 5.36   | 4.86   | 1.287903 | -0.36261 | 0.162551 | -1.08784 |
|               | Cluster average                                                  |         | 4.6224 | 3.7071 | 5.3581 | 4.5757 | 0.221048 | -1.04792 | 0.985323 | -0.15845 |
|               | Cluster SD                                                       |         | 1.6992 | 1.8721 | 1.768  | 1.7915 | 0.548161 | 0.339759 | 0.351474 | 0.600366 |

### Cluster 9

| Feature ID         | Name     | FDR, P  | U    | D    | L    | (L+D) | Uz       | Dz       | Lz       | (L+D)z   |
|--------------------|----------|---------|------|------|------|-------|----------|----------|----------|----------|
| Ccnj               | cyclin J | 0.0023  | 1.38 | 3    | 0.55 | 1.09  | -0.11856 | 1.417948 | -0.90578 | -0.39361 |
| Sox4 (13 29040787) |          | 0.00486 | 0.63 | 1.67 | 0.49 | 0.64  | -0.41668 | 1.488156 | -0.6731  | -0.39837 |

|               |                                                                  |         |        |        |        |        |          |          |          |          |
|---------------|------------------------------------------------------------------|---------|--------|--------|--------|--------|----------|----------|----------|----------|
| Ddit4         | DNA-damage-inducible transcript 4                                | 0.00713 | 3.05   | 7.61   | 2.58   | 3.58   | -0.50077 | 1.476287 | -0.70454 | -0.27098 |
| Dyrk3         | dual-specificity tyrosine-(Y)-phosphorylation regulated kinase 3 | 0.00773 | 0.38   | 1.28   | 0.49   | 0.7    | -0.82929 | 1.4154   | -0.55494 | -0.03118 |
| Gpt2          | glutamic pyruvate transaminase (alanine aminotransferase) 2      | 0.01    | 1.46   | 2.47   | 1.39   | 1.63   | -0.55653 | 1.469045 | -0.69692 | -0.21559 |
| Ppm1d         | protein phosphatase 1D magnesium-dependent, delta isoform        | 0.02    | 2.12   | 3.19   | 1.78   | 2.4    | -0.42008 | 1.360062 | -0.98573 | 0.045751 |
| Sik1          | salt inducible kinase 1                                          | 0.02    | 3.52   | 5.8    | 3.18   | 4.87   | -0.67682 | 1.199345 | -0.9566  | 0.434068 |
| Pik3ip1       | phosphoinositide-3-kinase interacting protein 1                  | 0.02    | 0.62   | 2.05   | 0.29   | 0.7    | -0.37957 | 1.460378 | -0.80417 | -0.27664 |
| Net1          | neuroepithelial cell transforming gene 1                         | 0.03    | 1.14   | 3.08   | 1.01   | 1.66   | -0.61473 | 1.43261  | -0.75192 | -0.06596 |
| Arl4d         | ADP-ribosylation factor-like 4D                                  | 0.03    | 1.03   | 3.05   | 0.27   | 0.79   | -0.20924 | 1.448295 | -0.83287 | -0.40618 |
| Ccbl1         | cysteine conjugate-beta lyase 1                                  | 0.03    | 1.57   | 2.37   | 1.37   | 2.05   | -0.5945  | 1.166974 | -1.03486 | 0.462386 |
| Exosc8        | exosome component 8                                              | 0.03    | 2.3    | 2.96   | 2      | 2.31   | -0.22853 | 1.40209  | -0.96973 | -0.20383 |
| Abhd15        | abhydrolase domain containing 15                                 | 0.03    | 2.96   | 4.69   | 2.09   | 3.24   | -0.26373 | 1.33718  | -1.06882 | -0.00463 |
| Klrg2         | killer cell lectin-like receptor subfamily G, member 2           | 0.04    | 0.3    | 1.13   | 0.19   | 0.53   | -0.56597 | 1.411949 | -0.82811 | -0.01787 |
| Ppp1r3b       | protein phosphatase 1, regulatory (inhibitor) subunit 3B         | 0.04    | 1.8    | 2.5    | 1.15   | 1.86   | -0.04985 | 1.218989 | -1.22805 | 0.05891  |
| D230025D16Rik | RIKEN cDNA D230025D16 gene                                       | 0.05    | 3.28   | 3.67   | 2.6    | 3.23   | 0.191979 | 1.072824 | -1.34385 | 0.07905  |
| Rnf169        | ring finger protein 169                                          | 0.06    | 2.78   | 4.53   | 2.06   | 3.71   | -0.4546  | 1.168974 | -1.12259 | 0.408213 |
| Zfp69         | zinc finger protein 69                                           | 0.06    | 0.56   | 1.37   | 0.54   | 0.62   | -0.53154 | 1.494568 | -0.58157 | -0.38146 |
| Dclre1b       | DNA cross-link repair 1B, PSO2 homolog (S. cerevisiae)           | 0.07    | 1.18   | 2.21   | 1.13   | 1.76   | -0.75932 | 1.24607  | -0.85667 | 0.369927 |
| Gm11827       | predicted gene 11827                                             | 0.07    | 0.32   | 1.36   | 0.24   | 0.93   | -0.74005 | 1.220847 | -0.89089 | 0.410092 |
| Ascl2         | achaete-scute complex homolog 2 (Drosophila)                     | 0.05    | 1.35   | 1.9    | 0.86   | 1.57   | -0.16039 | 1.099846 | -1.28315 | 0.343702 |
| Foxred2       | FAD-dependent oxidoreductase domain containing 2                 | 0.05    | 1.94   | 2.72   | 1.65   | 1.72   | -0.13753 | 1.45169  | -0.72839 | -0.58577 |
| Ankr9         | ankyrin repeat domain 9                                          | 0.08    | 1.52   | 3.01   | 1.04   | 1.9    | -0.41417 | 1.361704 | -0.98627 | 0.038736 |
| Napepld       | N-acyl phosphatidylethanolamine phospholipase D                  | 0.09    | 1.02   | 2.06   | 0.75   | 1.31   | -0.46902 | 1.371664 | -0.94689 | 0.044247 |
| Marveld1      | MARVEL (membrane-associating) domain containing 1                | 0.07    | 3.82   | 4.5    | 3.33   | 3.94   | -0.16126 | 1.25369  | -1.18086 | 0.088435 |
| Ankr16        | ankyrin repeat domain 16                                         | 0.1     | 2.18   | 3.29   | 1.61   | 2.35   | -0.25445 | 1.336754 | -1.07155 | -0.01075 |
| Osbpl11       | oxysterol binding protein-like 11                                | 0.11    | 4.89   | 5.52   | 4.44   | 4.72   | -0.00546 | 1.371196 | -0.98879 | -0.37694 |
|               | Cluster average                                                  |         | 1.8185 | 3.0737 | 1.4474 | 2.067  | -0.38225 | 1.339057 | -0.9251  | -0.03171 |
|               | Cluster SD                                                       |         | 1.1857 | 1.5382 | 1.0741 | 1.2701 | 0.253164 | 0.124826 | 0.20527  | 0.300066 |

### Cluster 10

| Feature ID    | Name                                                                    | FDR, P  | U      | D      | L      | (L+D)  | Uz       | Dz       | Lz       | (L+D)z   |
|---------------|-------------------------------------------------------------------------|---------|--------|--------|--------|--------|----------|----------|----------|----------|
| Zfp691        | zinc finger protein 691                                                 | 0.00492 | 1.45   | 1.23   | 0.69   | 0.43   | 1.060872 | 0.594089 | -0.55165 | -1.10331 |
| Rit1          | Ras-like without CAAX 1                                                 | 0.00713 | 4.69   | 4.31   | 3.78   | 3.79   | 1.241463 | 0.379808 | -0.82197 | -0.7993  |
| Angptl4       | angiopoietin-like 4                                                     | 0.01    | 4.07   | 3.12   | 2.17   | 1.79   | 1.255248 | 0.325435 | -0.60438 | -0.9763  |
| Armc7         | armadillo repeat containing 7                                           | 0.02    | 3.08   | 2.26   | 2.04   | 1.72   | 1.386352 | -0.02583 | -0.40471 | -0.95581 |
| Fam84b        | family with sequence similarity 84, member B(esophageal carcinoma cell) | 0.02    | 1.89   | 1.44   | 0.97   | 0.72   | 1.225924 | 0.357159 | -0.55022 | -1.03286 |
| CT030194.2    | ENSMUST00000075093                                                      | 0.02    | 1.42   | 1.09   | 0.67   | 0.59   | 1.23527  | 0.381575 | -0.70494 | -0.9119  |
| Pfh23         | PHD finger protein 23                                                   | 0.03    | 4.41   | 3.92   | 3.95   | 3.44   | 1.211411 | -0.02524 | 0.050475 | -1.23665 |
| 1810026J23Rik | RIKEN cDNA 1810026J23 gene                                              | 0.03    | 3.51   | 3.29   | 2.81   | 2.61   | 1.09256  | 0.564289 | -0.5883  | -1.06855 |
| Cd300lb       | CD300 antigen like family member B                                      | 0.03    | 6.66   | 5.39   | 5.04   | 4.29   | 1.328961 | 0.045478 | -0.30824 | -1.0662  |
| Pdp2          | pyruvate dehydrogenase phosphatase catalytic subunit 2                  | 0.03    | 1.7    | 1.36   | 1.01   | 0.71   | 1.177607 | 0.384763 | -0.4314  | -1.13097 |
| Dynl1c        | dynein light chain Tctex-type 1C                                        | 0.03    | 1.88   | 1.63   | 1.18   | 1.06   | 1.153247 | 0.501695 | -0.6711  | -0.98384 |
| Sema4b        | sema domain, immunoglobulin domain (Ig), transmembrane domain (TM) ar   | 0.04    | 2.84   | 2.51   | 2.26   | 1.73   | 1.078873 | 0.373867 | -0.16023 | -1.29251 |
| Tsku          | tsukushin                                                               | 0.04    | 4      | 3.29   | 3.35   | 2.78   | 1.289227 | -0.12992 | -0.00999 | -1.14931 |
| Snx33         | sorting nexin 33                                                        | 0.04    | 2.54   | 2.34   | 1.86   | 1.57   | 1.04497  | 0.593091 | -0.49142 | -1.14664 |
| Pdp1          | pyruvate dehydrogenase phosphatase catalytic subunit 1                  | 0.05    | 2.87   | 2.39   | 2.06   | 1.67   | 1.223591 | 0.280099 | -0.36855 | -1.13514 |
| Med22         | mediator complex subunit 22                                             | 0.05    | 4.4    | 4.11   | 3.7    | 3.49   | 1.163857 | 0.453292 | -0.5513  | -1.06585 |
| Sertad3       | SERTA domain containing 3                                               | 0.04    | 3.23   | 2.1    | 1.72   | 1.3    | 1.378517 | 0.015082 | -0.44342 | -0.95018 |
| B430306N03Rik | RIKEN cDNA B430306N03 gene                                              | 0.06    | 4.02   | 3.55   | 3.19   | 2.9    | 1.25238  | 0.279457 | -0.46576 | -1.06608 |
| Spsb2         | splA/ryanodine receptor domain and SOCS box containing 2                | 0.06    | 4.18   | 3.64   | 3.25   | 2.98   | 1.281228 | 0.244729 | -0.50385 | -1.0221  |
| Ovca2         | candidate tumor suppressor in ovarian cancer 2                          | 0.07    | 1.24   | 0.83   | 0.36   | 0.19   | 1.232285 | 0.368632 | -0.62141 | -0.97951 |
| Smcr7l        | Smith-Magenis syndrome chromosome region, candidate 7-like (human)      | 0.06    | 2.87   | 2.57   | 2.24   | 1.91   | 1.139879 | 0.416146 | -0.37996 | -1.17607 |
| Mlst8         | MTOR associated protein, LST8 homolog (S. cerevisiae)                   | 0.07    | 3.15   | 2.84   | 2.28   | 2.07   | 1.135693 | 0.512569 | -0.61307 | -1.03519 |
| Chst14        | carbohydrate (N-acetylglucosamine 4-O) sulfotransferase 14              | 0.07    | 4.12   | 3.78   | 3.31   | 3.29   | 1.236856 | 0.387298 | -0.78709 | -0.83706 |
| Iffo2         | intermediate filament family orphan 2                                   | 0.08    | 2.65   | 2.1    | 1.87   | 1.58   | 1.324317 | 0.11036  | -0.3973  | -1.03738 |
| Slc35c1       | solute carrier family 35, member C1                                     | 0.07    | 3.91   | 3.71   | 3.35   | 3.02   | 1.047667 | 0.539707 | -0.37462 | -1.21275 |
| Slc30a1       | solute carrier family 30 (zinc transporter), member 1                   | 0.09    | 3.97   | 3.42   | 3.29   | 2.92   | 1.310201 | 0.045972 | -0.25285 | -1.10333 |
| D17H6553E     | DNA segment, Chr 17, human D6553E                                       | 0.09    | 3.51   | 3.28   | 2.69   | 2.34   | 1.03532  | 0.606269 | -0.49434 | -1.14725 |
| Gpr157        | G protein-coupled receptor 157                                          | 0.1     | 2.75   | 2.46   | 2.05   | 1.91   | 1.191262 | 0.436145 | -0.63143 | -0.99597 |
| Engase        | endo-beta-N-acetylglucosaminidase                                       | 0.1     | 4.32   | 3.84   | 3.14   | 2.97   | 1.199708 | 0.434446 | -0.68156 | -0.95259 |
| Atmin         | ATM interactor                                                          | 0.09    | 3.62   | 3.38   | 2.95   | 2.7    | 1.103478 | 0.524604 | -0.51254 | -1.11554 |
| Usf1          | upstream transcription factor 1                                         | 0.1     | 5.01   | 4.7    | 4.11   | 3.95   | 1.141506 | 0.517952 | -0.66881 | -0.99065 |
| Ss18l1        | synovial sarcoma translocation gene on chromosome 18-like 1             | 0.09    | 1.84   | 1.56   | 1      | 0.83   | 1.126895 | 0.534349 | -0.65074 | -1.0105  |
| Mapk7         | mitogen-activated protein kinase 7                                      | 0.09    | 3.74   | 3.26   | 3.16   | 2.86   | 1.327729 | 0.013688 | -0.26007 | -1.08135 |
| Lhfp12        | lipoma HMGIC fusion partner-like 2                                      | 0.09    | 4.44   | 3.79   | 3.71   | 3.31   | 1.340605 | -0.04807 | -0.21898 | -1.07355 |
| Zfp710        | zinc finger protein 710                                                 | 0.1     | 5.36   | 4.87   | 4.88   | 4.27   | 1.153789 | 0.056009 | 0.078413 | -1.28821 |
|               | Cluster average                                                         |         | 3.4097 | 2.9531 | 2.574  | 2.2769 | 1.203678 | 0.315685 | -0.4585  | -1.06087 |
|               | Cluster SD                                                              |         | 1.2231 | 1.1363 | 1.1903 | 1.1347 | 0.097842 | 0.22022  | 0.220727 | 0.111613 |

### Cluster 11

| Feature ID    | Name                                                                    | FDR, P  | U    | D    | L    | (L+D) | Uz       | Dz       | Lz       | (L+D)z   |
|---------------|-------------------------------------------------------------------------|---------|------|------|------|-------|----------|----------|----------|----------|
| 2410075B13Rik | RIKEN cDNA 2410075B13 gene                                              | 0.00492 | 1.18 | 1.4  | 0.3  | 0.24  | 0.670904 | 1.039902 | -0.80509 | -0.90572 |
| Med18         | mediator of RNA polymerase II transcription, subunit 18 homolog (yeast) | 0.00661 | 1.55 | 1.69 | 0.48 | 0.6   | 0.748329 | 0.971236 | -0.95531 | -0.76425 |
| Zfp212        | Zinc finger protein 212                                                 | 0.00669 | 2.37 | 2.42 | 1.58 | 1.69  | 0.803985 | 0.917223 | -0.98517 | -0.73604 |
| 2810008D09Rik | RIKEN cDNA 2810008D09 gene                                              | 0.01    | 3.24 | 3.32 | 1.39 | 1.74  | 0.816728 | 0.896652 | -1.03152 | -0.68186 |
| 1110054O05Rik | RIKEN cDNA 1110054O05 gene                                              | 0.01    | 2.28 | 2.38 | 1.22 | 1.46  | 0.765461 | 0.937475 | -1.05788 | -0.64505 |
| Frat2         | frequently rearranged in advanced T-cell lymphomas 2                    | 0.01    | 2.13 | 2.29 | 1.2  | 1.31  | 0.713595 | 1.000829 | -0.95595 | -0.75848 |
| Mett11d1      |                                                                         | 0.01    | 1.84 | 1.86 | 0.94 | 1.04  | 0.842927 | 0.883067 | -0.96335 | -0.76265 |
| Smug1         | single-strand selective monofunctional uracil DNA glycosylase           | 0.02    | 1.66 | 1.74 | 0.85 | 0.87  | 0.781666 | 0.946227 | -0.88452 | -0.84338 |
| Zfp161        | zinc finger protein 161                                                 | 0.02    | 1.74 | 1.78 | 0.8  | 0.86  | 0.827534 | 0.901919 | -0.92052 | -0.80894 |
| Zfp324        | zinc finger protein 324                                                 | 0.02    | 1.2  | 1.25 | 0.39 | 0.44  | 0.811023 | 0.917737 | -0.91774 | -0.81102 |
| Zkscan14      | zinc finger with KRAB and SCAN domains 14                               | 0.03    | 2.36 | 2.41 | 0.7  | 0.89  | 0.835608 | 0.889869 | -0.96583 | -0.75964 |
| Txnip         | thioredoxin interacting protein                                         | 0.03    | 7.29 | 7.76 | 4.04 | 4.72  | 0.724202 | 0.978688 | -1.03554 | -0.66735 |

|               |                                                                          |      |        |        |        |        |          |          |          |          |
|---------------|--------------------------------------------------------------------------|------|--------|--------|--------|--------|----------|----------|----------|----------|
| Lysmd4        | LysM, putative peptidoglycan-binding, domain containing 4                | 0.03 | 1.72   | 1.89   | 0.75   | 0.9    | 0.706407 | 1.002924 | -0.98548 | -0.72385 |
| Zfp764        | zinc finger protein 764                                                  | 0.03 | 1.95   | 2.06   | 1.24   | 1.3    | 0.731123 | 0.988479 | -0.92999 | -0.78961 |
| Triap1        | TP53 regulated inhibitor of apoptosis 1                                  | 0.03 | 5.06   | 4.93   | 4.08   | 4.37   | 0.971701 | 0.690987 | -1.14445 | -0.51824 |
| AC099934.2    |                                                                          | 0.03 | 1.46   | 1.39   | 0.66   | 0.83   | 0.938184 | 0.763057 | -1.06328 | -0.63797 |
| 5730403M16Rik |                                                                          | 0.03 | 2.54   | 2.52   | 1.73   | 1.83   | 0.885038 | 0.839062 | -0.97699 | -0.74711 |
| Zfp553        | zinc finger protein 553                                                  | 0.04 | 1.83   | 1.98   | 0.78   | 0.81   | 0.745464 | 0.978421 | -0.88524 | -0.83865 |
| Commmd5       | COMM domain containing 5                                                 | 0.04 | 3.71   | 3.62   | 2.78   | 3.06   | 0.934903 | 0.733367 | -1.14764 | -0.52063 |
| Lipt2         | lipoyl(octanoyl) transferase 2 (putative)                                | 0.05 | 1.37   | 1.57   | 0.44   | 0.7    | 0.652262 | 1.024983 | -1.08089 | -0.59635 |
| Etaa1         | Ewing's tumor-associated antigen 1                                       | 0.05 | 1.55   | 1.65   | 0.7    | 0.78   | 0.761117 | 0.961411 | -0.94138 | -0.78115 |
| Zfp866        | zinc finger protein 866                                                  | 0.05 | 1.82   | 2.02   | 0.98   | 1.24   | 0.626992 | 1.038134 | -1.09981 | -0.56532 |
| Uck1          | uridine-cytidine kinase 1                                                | 0.05 | 3.67   | 3.65   | 2.81   | 2.95   | 0.88102  | 0.836969 | -1.01317 | -0.70482 |
| Taf8          | TAF8 RNA polymerase II, TATA box binding protein (TBP)-associated factor | 0.05 | 3.46   | 3.6    | 2.66   | 2.96   | 0.663446 | 0.98373  | -1.16675 | -0.48043 |
| Pelo          | pelota homolog (Drosophila)                                              | 0.07 | 2.5    | 2.64   | 1.52   | 1.74   | 0.723259 | 0.9764   | -1.04873 | -0.65093 |
| Mlycd         | malonyl-CoA decarboxylase                                                | 0.06 | 2.92   | 3.02   | 2.19   | 2.29   | 0.740476 | 0.975548 | -0.97555 | -0.74048 |
| Zfp58         | zinc finger protein 58                                                   | 0.06 | 1.62   | 1.69   | 0.76   | 0.9    | 0.785507 | 0.931164 | -1.00399 | -0.71268 |
| Eid2b         | EP300 interacting inhibitor of differentiation 2B                        | 0.05 | 1.45   | 1.55   | 0.71   | 0.8    | 0.743741 | 0.974359 | -0.96283 | -0.75527 |
| Eid2          | EP300 interacting inhibitor of differentiation 2                         | 0.07 | 2.02   | 2.18   | 1.37   | 1.55   | 0.627679 | 1.046132 | -1.07228 | -0.60153 |
| Gm16009       | predicted gene 16009                                                     | 0.07 | 3.82   | 3.84   | 2.79   | 3.06   | 0.828551 | 0.866    | -1.10005 | -0.5945  |
| Rpusd2        | RNA pseudouridylylase synthase domain containing 2                       | 0.06 | 1.21   | 1.36   | 0.44   | 0.41   | 0.709385 | 1.009126 | -0.82928 | -0.88923 |
| Rbak          | RB-associated KRAB repressor                                             | 0.05 | 1.71   | 1.62   | 0.55   | 0.85   | 0.922803 | 0.765358 | -1.10649 | -0.58167 |
| Cdkn2aipnl    | CDKN2A interacting protein N-terminal like                               | 0.06 | 2.35   | 2.52   | 1.63   | 1.95   | 0.592717 | 1.016977 | -1.20415 | -0.40554 |
| Cnr2          | cannabinoid receptor 2 (macrophage)                                      | 0.06 | 2.76   | 3.46   | 1.56   | 2      | 0.375541 | 1.210078 | -1.05509 | -0.53053 |
| Nr2c2ap       | nuclear receptor 2C2-associated protein                                  | 0.06 | 3.27   | 3.16   | 2.05   | 2.52   | 0.909161 | 0.716839 | -1.22387 | -0.40213 |
| Zfp472        | zinc finger protein 472                                                  | 0.06 | 1.76   | 2.56   | 0.37   | 1.03   | 0.349839 | 1.197932 | -1.12372 | -0.42405 |
| 2310044G17Rik | RIKEN cDNA 2310044G17 gene                                               | 0.09 | 3.92   | 4.04   | 3.23   | 3.44   | 0.681359 | 0.992837 | -1.10964 | -0.56455 |
| Itpr1p1       | inositol 1,4,5-triphosphate receptor interacting protein-like 1          | 0.08 | 3.5    | 3.91   | 2.23   | 2.56   | 0.572332 | 1.09379  | -1.04292 | -0.62321 |
| Zbtb48        | zinc finger and BTB domain containing 48                                 | 0.08 | 1.75   | 1.74   | 0.79   | 0.93   | 0.870355 | 0.850906 | -0.99678 | -0.72449 |
| E130102H24Rik | RIKEN cDNA E130102H24 gene (mir101a)                                     | 0.07 | 1.79   | 2.09   | 0.42   | 0.94   | 0.625295 | 1.016105 | -1.1594  | -0.482   |
| Txn14b        | thioredoxin-like 4B                                                      | 0.08 | 2.72   | 2.87   | 1.97   | 2.26   | 0.639158 | 1.000945 | -1.16978 | -0.47032 |
| Xrcc6bp1      | XRCC6 binding protein 1                                                  | 0.07 | 2.03   | 2.38   | 1.09   | 1.38   | 0.525449 | 1.118698 | -1.06785 | -0.5763  |
| Fbxo32        | F-box protein 32                                                         | 0.08 | 1.55   | 2.02   | 0.67   | 0.83   | 0.447704 | 1.192555 | -0.94691 | -0.69335 |
| Zfp251        | zinc finger protein 251                                                  | 0.07 | 1.73   | 2.02   | 1.24   | 1.2    | 0.460161 | 1.191376 | -0.77534 | -0.8762  |
| Card6         | caspase recruitment domain family, member 6                              | 0.09 | 1.2    | 1.7    | 0.54   | 0.68   | 0.321193 | 1.26588  | -0.92579 | -0.66128 |
| Zfp746        | zinc finger protein 746                                                  | 0.08 | 3.43   | 3.83   | 2.51   | 3.02   | 0.411376 | 1.119119 | -1.21643 | -0.31406 |
| Patz1         | POZ (BTB) and AT hook containing zinc finger 1                           | 0.09 | 2.2    | 2.38   | 1.41   | 1.45   | 0.677028 | 1.035454 | -0.89607 | -0.81642 |
| Zfp652        | zinc finger protein 652                                                  | 0.09 | 3.4    | 3.73   | 2.93   | 2.99   | 0.366493 | 1.246076 | -0.88625 | -0.72632 |
| Arl11         | ADP-ribosylation factor-like 11                                          | 0.1  | 6.11   | 6.17   | 5.27   | 5.54   | 0.768585 | 0.905223 | -1.14434 | -0.52947 |
| Atg14         | VATG14 autophagy related 14 homolog (S. cerevisiae)                      | 0.11 | 2.89   | 2.95   | 1.98   | 2.04   | 0.807172 | 0.921126 | -0.92113 | -0.80717 |
| Sap25         | sin3 associated polypeptide                                              | 0.11 | 5.23   | 5.15   | 4.33   | 4.53   | 0.938523 | 0.759757 | -1.0726  | -0.62568 |
|               | Cluster average                                                          |      | 2.5455 | 2.7012 | 1.5696 | 1.7741 | 0.71099  | 0.970943 | -1.01864 | -0.66329 |
|               | Cluster SD                                                               |      | 1.2848 | 1.2837 | 1.1577 | 1.2173 | 0.164521 | 0.133437 | 0.107425 | 0.138736 |

## Cluster 12

| Feature ID    | Name                                                                           | FDR, P  | U    | D    | L    | (L+D) | Uz       | Dz       | Lz       | (L+D)z   |
|---------------|--------------------------------------------------------------------------------|---------|------|------|------|-------|----------|----------|----------|----------|
| Tmem81        | transmembrane protein 81                                                       | 0.00423 | 2.54 | 2.5  | 1.54 | 1.51  | 0.900272 | 0.830686 | -0.83938 | -0.89157 |
| Zfp623        | zinc finger protein 623                                                        | 0.00492 | 1.8  | 1.75 | 0.69 | 0.68  | 0.905256 | 0.825848 | -0.85761 | -0.87349 |
| Lcmt2         | leucine carboxyl methyltransferase 2                                           | 0.00661 | 2.26 | 2.25 | 1.16 | 1.13  | 0.87365  | 0.858049 | -0.84245 | -0.88925 |
| Gtf3c4        | general transcription factor IIIC, polypeptide 4                               | 0.00729 | 2.46 | 2.33 | 1.6  | 1.47  | 0.985738 | 0.726857 | -0.72686 | -0.98574 |
| Zscan2        | zinc finger and SCAN domain containing 2                                       | 0.00918 | 1.18 | 1.22 | 0.34 | 0.35  | 0.82503  | 0.906015 | -0.87565 | -0.8554  |
| Zfp12         | zinc finger protein 12                                                         | 0.00954 | 1.77 | 1.74 | 0.71 | 0.69  | 0.890392 | 0.841154 | -0.84936 | -0.88219 |
| Bat4          |                                                                                | 0.01    | 3.1  | 2.94 | 2.04 | 2.22  | 1.00351  | 0.697679 | -1.02262 | -0.67856 |
| Rab19         | RAB19, member RAS oncogene family                                              | 0.01    | 1.64 | 1.63 | 1.01 | 0.75  | 0.852547 | 0.830259 | -0.55165 | -1.13116 |
| Tmem177       | transmembrane protein 177                                                      | 0.01    | 1.66 | 1.49 | 0.91 | 0.83  | 1.056263 | 0.645829 | -0.75447 | -0.94762 |
| Kbtbd4        |                                                                                | 0.01    | 3.25 | 3.06 | 2.49 | 2.43  | 1.080796 | 0.616726 | -0.77549 | -0.92204 |
| Mrm1          | mitochondrial rRNA methyltransferase 1 homolog (S. cerevisiae)                 | 0.02    | 2.51 | 2.42 | 1.34 | 1.24  | 0.929318 | 0.797083 | -0.78974 | -0.93666 |
| Trmt12        | tRNA methyltransferase 12 homolog (S. cerevisiae)                              | 0.02    | 1.78 | 1.53 | 0.69 | 0.74  | 1.076728 | 0.624321 | -0.89577 | -0.80528 |
| Zscan22       | zinc finger and SCAN domain containing 22                                      | 0.02    | 1.69 | 1.52 | 0.7  | 0.63  | 1.013005 | 0.702715 | -0.79398 | -0.92174 |
| Nhlrc1        | NHL repeat containing 1                                                        | 0.02    | 1.28 | 1.23 | 0.35 | 0.37  | 0.91358  | 0.816905 | -0.88458 | -0.84591 |
| 5730409E04Rik | RIKEN cDNA 5730409E04Rik gene                                                  | 0.02    | 3.17 | 3.2  | 2.28 | 2.28  | 0.837087 | 0.894488 | -0.86579 | -0.86579 |
| Zfp790        | zinc finger protein 790                                                        | 0.02    | 1.63 | 1.52 | 0.79 | 0.76  | 0.980139 | 0.743182 | -0.82935 | -0.89397 |
| Zfp688        | zinc finger protein 688                                                        | 0.03    | 2.22 | 2.12 | 1.07 | 1.04  | 0.941634 | 0.786633 | -0.84088 | -0.88738 |
| Tmem186       | transmembrane protein 186                                                      | 0.03    | 2.39 | 2.27 | 1.28 | 1.48  | 0.961043 | 0.745482 | -1.0329  | -0.67363 |
| Brf2          | BRF2, subunit of RNA polymerase III transcription initiation factor, BRF1-like | 0.03    | 2.9  | 2.79 | 1.82 | 1.83  | 0.95662  | 0.770375 | -0.87196 | -0.85503 |
| 2900076A07Rik | RIKEN cDNA 2900076A07 gene, mir1839                                            | 0.03    | 1.45 | 1.33 | 0.53 | 0.44  | 0.97419  | 0.746087 | -0.7746  | -0.94568 |
| Bet1l         | blocked early in transport 1 homolog (S. cerevisiae)-like                      | 0.03    | 3.91 | 3.76 | 2.93 | 3.09  | 1.005868 | 0.69637  | -1.01618 | -0.68605 |
| 2310046O06Rik | RIKEN cDNA 2310046O06 gene                                                     | 0.03    | 2.88 | 2.89 | 1.97 | 1.94  | 0.856466 | 0.875085 | -0.83785 | -0.8937  |
| Asb8          | ankyrin repeat and SOCS box-containing 8                                       | 0.03    | 3.78 | 3.66 | 2.86 | 2.83  | 0.979911 | 0.743551 | -0.83219 | -0.89128 |
| Zfp780b       | zinc finger protein 780B                                                       | 0.03    | 1.35 | 1.17 | 0.4  | 0.56  | 1.041348 | 0.650842 | -1.01965 | -0.67254 |
| Surf6         | surfeit gene 6                                                                 | 0.03    | 2.9  | 2.76 | 2.13 | 1.96  | 1.00097  | 0.697974 | -0.66551 | -1.03343 |
| Giyd2         |                                                                                | 0.03    | 2.02 | 1.96 | 1.27 | 1.13  | 0.923259 | 0.792916 | -0.70602 | -1.01015 |
| 9930012K11Rik | RIKEN cDNA 9930012K11 gene                                                     | 0.03    | 1.1  | 0.88 | 0.24 | 0.34  | 1.105735 | 0.576905 | -0.96151 | -0.72113 |
| Zfp61         | zinc finger protein 61                                                         | 0.03    | 1.33 | 1.32 | 0.47 | 0.47  | 0.876124 | 0.855867 | -0.866   | -0.866   |
| Pygo2         | pygopus 2                                                                      | 0.03    | 3.59 | 3.52 | 2.86 | 2.73  | 0.936991 | 0.778944 | -0.71121 | -1.00473 |
| Clk2          | CDC-like kinase 2                                                              | 0.03    | 3.01 | 2.89 | 2.2  | 2.3   | 1.002089 | 0.708794 | -0.97765 | -0.73324 |
| D330012F22Rik | RIKEN cDNA D330012F22 gene                                                     | 0.04    | 1.71 | 1.63 | 0.72 | 0.67  | 0.934898 | 0.793113 | -0.8197  | -0.90831 |
| Zfp707        | zinc finger protein 707                                                        | 0.04    | 1.47 | 1.46 | 0.43 | 0.45  | 0.87437  | 0.857474 | -0.88282 | -0.84903 |
| Alkbh4        | alkB, alkylation repair homolog 4 (E. coli)                                    | 0.04    | 2.19 | 1.97 | 1.33 | 1.16  | 1.065077 | 0.620874 | -0.67135 | -1.0146  |
| Tcta          | T-cell leukemia translocation altered gene                                     | 0.04    | 3.48 | 3.33 | 2.48 | 2.55  | 1.003345 | 0.713919 | -0.92616 | -0.7911  |
| Fam58b        | family with sequence similarity 58, member B                                   | 0.04    | 4    | 3.87 | 3.02 | 3.07  | 0.986502 | 0.73504  | -0.90913 | -0.81241 |
| Fn3krp        | fructosamine 3 kinase related protein                                          | 0.04    | 1.88 | 2.07 | 1.44 | 1.15  | 0.587061 | 1.042334 | -0.46725 | -1.16214 |
| Klhdcs        | kelch domain containing 5                                                      | 0.04    | 1.44 | 1.39 | 0.63 | 0.54  | 0.914684 | 0.810742 | -0.76917 | -0.95626 |
| Wdr85         | WD repeat domain 85                                                            | 0.04    | 2.3  | 2.09 | 1.52 | 1.44  | 1.093699 | 0.5971   | -0.75081 | -0.93999 |



|               |                                                                  |      |        |        |        |        |          |          |          |          |
|---------------|------------------------------------------------------------------|------|--------|--------|--------|--------|----------|----------|----------|----------|
| Tcfap4        | transcription factor AP4                                         | 0.05 | 2.12   | 1.92   | 0.94   | 0.85   | 1.01043  | 0.705395 | -0.78928 | -0.92655 |
| Zfp84         | zinc finger protein 84, Mir1964                                  | 0.05 | 2.53   | 2.23   | 1.36   | 1.33   | 1.094079 | 0.602358 | -0.82363 | -0.8728  |
| Cbx8          | chromobox homolog 8 (Drosophila Pc class)                        | 0.05 | 1.31   | 1.08   | 0.34   | 0.24   | 1.065849 | 0.633875 | -0.75595 | -0.94377 |
| Mad2l1bp      | MAD2L1 binding protein                                           | 0.05 | 3.44   | 3.28   | 2.38   | 2.42   | 1.00299  | 0.716421 | -0.89553 | -0.82388 |
| Pars2         | prolyl-tRNA synthetase (mitochondrial)(putative)                 | 0.05 | 1.55   | 1.55   | 0.58   | 0.54   | 0.865672 | 0.865672 | -0.8307  | -0.90065 |
| Zswim3        | zinc finger, SWIM domain containing 3                            | 0.05 | 1.75   | 1.49   | 0.88   | 0.79   | 1.119008 | 0.562181 | -0.74422 | -0.93697 |
| Zfp28         | zinc finger protein 28                                           | 0.05 | 2.06   | 1.97   | 1.2    | 1.26   | 0.960765 | 0.763122 | -0.92782 | -0.79606 |
| Zfp768        | zinc finger protein 768                                          | 0.06 | 2.97   | 2.84   | 2.17   | 2.13   | 1.007005 | 0.711162 | -0.81357 | -0.9046  |
| AW209491      | expressed sequence AW209491                                      | 0.06 | 2.07   | 2.1    | 1.3    | 1.29   | 0.832805 | 0.898553 | -0.85472 | -0.87664 |
| Acrbp         | proacrosin binding protein                                       | 0.06 | 1.29   | 1.05   | 0.47   | 0.53   | 1.138093 | 0.53778  | -0.91298 | -0.7629  |
| Casp2         | caspase 2                                                        | 0.07 | 2.58   | 2.63   | 1.69   | 1.61   | 0.818689 | 0.909152 | -0.79155 | -0.93629 |
| Fam78a        | family with sequence similarity 78, member A                     | 0.08 | 2.72   | 2.59   | 1.68   | 1.56   | 0.967758 | 0.751778 | -0.76008 | -0.95945 |
| Thap11        | THAP domain containing 11                                        | 0.08 | 4.04   | 3.92   | 3.12   | 3      | 0.970762 | 0.74674  | -0.74674 | -0.97076 |
| Gm10521       | predicted gene 10521                                             | 0.08 | 2.37   | 2.4    | 1.75   | 1.52   | 0.812191 | 0.879873 | -0.58658 | -1.10548 |
| 2410131K14Rik | RIKEN cDNA 2410131K14 gene                                       | 0.08 | 1.84   | 1.75   | 1.08   | 0.98   | 0.960512 | 0.758299 | -0.74707 | -0.97175 |
| B3galt4       | UDP-Gal:betaGlcNAc beta 1,3-galactosyltransferase, polypeptide 4 | 0.09 | 3.08   | 2.97   | 1.91   | 1.75   | 0.939562 | 0.781169 | -0.74517 | -0.97556 |
| Tab1          | TGF-beta activated kinase 1/MAP3K7 binding protein 1             | 0.09 | 3.61   | 3.44   | 2.66   | 2.52   | 1.009578 | 0.698939 | -0.72635 | -0.98217 |
| Rnf144b       | ring finger protein 144B                                         | 0.09 | 4.38   | 4.36   | 3.34   | 3.44   | 0.881317 | 0.846064 | -0.95182 | -0.77556 |
| Kctd21        | potassium channel tetramerisation domain containing 21           | 0.09 | 2.66   | 2.55   | 1.76   | 1.69   | 0.968975 | 0.753647 | -0.7928  | -0.92982 |
| Irf2bp1       | interferon regulatory factor 2 binding protein 1                 | 0.09 | 3.21   | 3.27   | 2.47   | 2.31   | 0.796883 | 0.917928 | -0.69601 | -1.0188  |
| Mcat          | malonyl CoA:ACP acyltransferase (mitochondrial)                  | 0.09 | 3.08   | 2.84   | 2.27   | 2.17   | 1.113062 | 0.567889 | -0.7269  | -0.95405 |
| Zfp646        | zinc finger protein 646                                          | 0.09 | 3      | 2.9    | 2.26   | 2.11   | 0.965913 | 0.74258  | -0.68675 | -1.02175 |
| 2410002I01Rik | RIKEN cDNA 2410002I01 gene                                       | 0.09 | 2.98   | 2.9    | 2.14   | 2.15   | 0.950731 | 0.776883 | -0.87467 | -0.85294 |
| Ftsj2         | FtsJ homolog 2 (E. coli)                                         | 0.1  | 2.73   | 2.43   | 1.58   | 1.37   | 1.072103 | 0.614265 | -0.68294 | -1.00343 |
| Cd3eap        | CD3E antigen, epsilon polypeptide associated protein             | 0.1  | 2.51   | 2.62   | 1.78   | 1.6    | 0.746386 | 0.961033 | -0.67809 | -1.02933 |
| Nup62         | nucleoporin 62                                                   | 0.1  | 2.17   | 1.9    | 1.17   | 1.26   | 1.118003 | 0.56413  | -0.93338 | -0.74875 |
| Iffo1         | intermediate filament family orphan 1                            | 0.1  | 3.1    | 2.86   | 2.21   | 2.24   | 1.113117 | 0.576136 | -0.87819 | -0.81106 |
| Zbtb12        | zinc finger and BTB domain containing 12                         | 0.1  | 2.59   | 2.35   | 1.76   | 1.78   | 1.129991 | 0.552974 | -0.86552 | -0.81744 |
| Zfp282        | zinc finger protein 282                                          | 0.1  | 1.79   | 1.74   | 1.02   | 0.98   | 0.921017 | 0.808008 | -0.81931 | -0.90972 |
| Gm11641       | predicted gene 11641                                             | 0.11 | 2.9    | 2.94   | 2.05   | 1.96   | 0.825778 | 0.901278 | -0.77859 | -0.94846 |
| Mtif3         | mitochondrial translational initiation factor 3                  | 0.11 | 1.57   | 1.46   | 0.69   | 0.76   | 0.97996  | 0.740415 | -0.93641 | -0.78397 |
|               | Cluster average                                                  |      | 2.4206 | 2.3158 | 1.5109 | 1.4694 | 0.96093  | 0.750723 | -0.81476 | -0.89689 |
|               | Cluster SD                                                       |      | 0.8057 | 0.8075 | 0.8036 | 0.8047 | 0.102843 | 0.110419 | 0.108847 | 0.104008 |

**Table S3 qPCR primers used in this study**

**Expression primers**

|                 |                             |  |
|-----------------|-----------------------------|--|
| t64_mKdm6b_RT_F | CTCTAAGCATGGAGGTGGTTCTC     |  |
| t65_mKdm6b_RT_R | TTCACTTCGGCTCAGTGAGTTTG     |  |
| s42_mMaff_F1    | CTGTCCGGATGAAGCGCTGATGGG    |  |
| s43_mMaff_R1    | CGTAGCCGCGGTTCTTGAGTGTG     |  |
| o93_mDusp1_1_F  | TTTGTGTAGGTTCGGTGGTCTGCCTT  |  |
| o94_mDusp1_1_R  | TGGCTTTGTCTGTCTCAGTGCCGAAAG |  |
| p20_mCited2_1_F | GCTGCCGCCCAATGTCATAGACA     |  |
| p21_mCited2_1_R | GAGTTCGGGCAGCTCCTTGATGC     |  |
| m89_mMt2_F      | GGCGCCTGCAAATGCAAACAATGC    |  |
| m90_mMt2_R      | CACCTGTTCGGAAGCCTCTTTGCAG   |  |
| u55_mEdn1_F1    | AACCGAGCACATTGACTACAGAG     |  |
| u56_mEdn1_R1    | TAGAAGCCACACAGATGGTCTTG     |  |
| v94_mIRF1_F     | CCCAAGACATGGAAGGCAAACCTT    |  |
| v95_mIRF1_R     | GCTGCCCTTGTTCTACTCTGAT      |  |
| q25_mRasgef1b_R | AGGTCCAGCCTTTTGGGCAGAGT     |  |
| q26_mRasgef1b_F | GCCAGAAAACAAAGGCCAGCCC      |  |
| k47_mIL1b_F     | GGGCTGCTTCCAAACCTTTGACC     |  |
| k48_mIL1b_R     | GTAGCTGCCACAGCTTCTCCACAGCC  |  |
| q63_mHspa1a_F   | ACTTTGTGTATTGCACGTGGGCTTT   |  |
| q64_mHspa1a_R   | GCGGGGCAGTGCTGAATTGAAGA     |  |
| m77_mIL12-p40_F | AGGACTCCCCATTCTACTTCTCC     |  |
| m78_mIL12-p40_R | CACCCCTCCTCTGTCTCCTTCAT     |  |
| u85_mEtv3_F1    | CTCCTGTTCCCTCTCGGATTAAG     |  |
| u86_mEtv3_R1    | CTTCCCTCTTCTATGGTCCCTG      |  |
| p48_mAtf3_F     | TGGGACCACATCCTCCACTGTGG     |  |
| p49_mAtf3_R     | ACCCTGGCCATTGGACAACCTCA     |  |
| r98_mGadd45a_F  | GCAGTTGAACTCGGCCCTTGAC      |  |
| r99_mGadd45a_R  | ATCTCCCGGAACGGTGATGGCA      |  |
| s11_mAngptl4_F  | GGGGCAGGGCATGGATACACACT     |  |
| s12_mAngptl4_R  | TGGGACCAAGACCATGACCTCCG     |  |
| s14_mSnx33_F    | GGCTCTCCCATATTCCAGGGACC     |  |
| s15_mSnx33_R    | GCCCAAGCACGACCTCTTCCAAA     |  |
| r2_mTxnip_F     | GTGGCCCGACACACTTACCTTGC     |  |
| r3_mTxnip_R     | TCTGCACTCTGAGGCTCTTGCCA     |  |
| s16_mFrat2_F    | GAGTGACTGAGTCCGGTCCGCTT     |  |
| s17_mFrat2_R    | CCGGAACCTCATCAAGGAGGCG      |  |
| u51_mCbx8_F     | AAGAATCCTTGGTCCGTGTTGC      |  |
| u52_mCbx8_R     | TGACTAACCTGGAGAAAGTGGTC     |  |
| v60_mZfp623_F   | CCTCTGAGTCTCGGGAATTTTCAT    |  |
| v61_mZfp623_R   | TCCTGTTTGAATCTTCCAGTGGG     |  |
| o87_mDdit4_F    | GCGCCTTCATTCGGACCTTA        |  |
| o88_mDdit4_R    | AAGAGGAGGACGAGAAACGA        |  |
| o99_mSik1_F     | GCTCTCCACTTCTGAAACGCGCA     |  |
| p1_mSik1_R      | CATGCCGTTTGTCTTCCCCTGGG     |  |
| p46_mNfil3_F    | CGGTGGAGCACACTCAGGAAAGC     |  |
| p47_mNfil3_R    | CAAAGCTCTCCAACCTCCACGGGC    |  |
| w15_mNcoa5_F    | TCTCTGCAGCTTACGACAATTA      |  |
| w16_mNcoa5_R    | TAGATTGGTGGCAGTTCTTACCC     |  |

|                      |                           |                                 |
|----------------------|---------------------------|---------------------------------|
| o89_mKLF4_F          | CCTTGGTGTAGCTGAGATTG      |                                 |
| o90_mKLF4_R          | GAACAGGGAGGGAGAGAGAAA     |                                 |
| u15_mKLF9_F2         | CCCCTGTGTGAGAAGAGATTCAT   |                                 |
| u16_mKLF9_R2         | TCTTGATCATGCTGGGATGGAAC   |                                 |
| L71_mGILZ_F2_397     | TGTACGCTGTGAGAGAGGAGG     |                                 |
| L72_mGILZ_R2_564     | CTTTCAGGTGCTGGCTCTTC      |                                 |
| p54_mFKBP5_F         | TGGGATCGACAAAGCCCTGGTGA   |                                 |
| p55_mFKBP5_R         | GCTCAGCATTGGGGTCAATGCCA   |                                 |
| p10_mKlf2_F          | ACCCTTTCAGTGCCACTTGTGCG   |                                 |
| p11_mKlf2_R          | CCGAGTCGACCCAGGCTACATGT   |                                 |
| v88_mTiparp_F        | CCCTTGAGCTTGTGTTTGAACCTT  |                                 |
| v89_mTiparp_R        | ATAGGGCAATACGGTGTGATGTT   |                                 |
| p66_mTGFb3_F         | CTTTGCGGAGGACGGAGTAACGC   |                                 |
| p67_mTGFb3_R         | ACTTGGACCCACAGTCACCAGCA   |                                 |
| p64_mL15ra_F         | CCACGTGTCCACCTCCCCTATCT   |                                 |
| p65_mL15ra_R         | CAGGGTGGATGTTCCAGCTTCCCG  |                                 |
| v78_mJunB_F          | AGGTGGGTTTTCAGGAGTTTTGTAG |                                 |
| v79_mJunB_R          | CACGAAAATGGAACAGCCTTTCT   |                                 |
| v84_mBCL3_F          | TGTCTGTGTTCTGCTGACCTTA    |                                 |
| v85_mBCL3_R          | CCGGAGGCCCTTTACTACCA      |                                 |
| p48_mATF3_F          | TGGGACCACATCCTCCACTGTGG   |                                 |
| p49_mATF3_R          | ACCCTGGCCATTGGACAACCTCA   |                                 |
| v70_mPPARg1_F        | AGAAGCGGTGAACCACTGATATTC  | Lefterova et al. Mol Cell Biol. |
| v71_mPPARg1_R        | AGAGGTCCACAGAGCTGATTC     | (2010) 30, 2078-89              |
| r92_mMir22_hg_F      | TCCCTCGACCTCGCTTGCTTTCT   |                                 |
| r93_mMir22_hg_R      | GCTTCCAGGCTGCCCTTTCTCAC   |                                 |
| q65_mMir155_hg_F     | GGAGGCTTGCTGAAGGCTGTATGC  |                                 |
| q66_mMir155_hg_R     | CATCCTCCCACGGTGGCCATTTG   |                                 |
| s9_mMir101a_hg_F     | CTGTGATAACTGAGCCAGGGCAGC  |                                 |
| s10_mMir101a_hg_R    | CAGTCCCTTCACTCCGAGGGGCAC  |                                 |
| s7_mZfp84_F          | GCCCTGGCACCCCTTGAAGAAAG   |                                 |
| s8_mZfp84_R          | ACCACCAACTCCTGAAATGAACGCA |                                 |
| s5_mMir1839_hg_F     | TGGGTACTCTCCTTGCTGATGGCA  |                                 |
| s6_mMir1839_hg_R     | AGCCATGAACGCTGAAGACATGC   |                                 |
| r90_mlfrd1-mir1938_F | CCTCCGCAAAACTGGAAGGATCGC  |                                 |
| r91_mlfrd1-mir1938_R | CCTAATAGGTGGCCCGCATCGGA   |                                 |
| u59_Mir125a_hg_F     | GTCCTTGAGACCCCTTTAACCTG   |                                 |
| u60_Mir125a_hg_R     | CAGGCTCCCAAGAACCTCAC      |                                 |
| u57_mlcam5_F1        | GCTCAACTGCAGCACTAAGTGC    |                                 |
| u58_mlcam5_R1        | CTCAGGCTCTCGGATGTCCAC     |                                 |
| v50_mZkscan14_F      | GTGTTACAGTTCGTGTTTCCAA    |                                 |
| v51_mZkscan14_R      | GGCACTTCCCTTTACCAGCATTTT  |                                 |
| v54_mZfp472_F        | AAACTCACCAACAGAGTCCAGAG   |                                 |
| v55_mZfp472_F        | CCAGTTTGACCTTTGAAGTGCAT   |                                 |
| v56_mRbak_F          | TCACTGTCTAAGGCTTCCATGC    |                                 |
| v57_mRbak_R          | GGGTAACCTCTCTCAACACGAT    |                                 |
| v58_mZfp688_F        | TGTTCAACCACCTCTTTAGGTTGC  |                                 |
| v59_mZfp688_R        | ACATTCCAATGAGACAGAGTGG    |                                 |
| v60_mZfp623_F        | CCTCTGAGTCTCGGGAATTTTCAT  |                                 |
| v61_mZfp623_R        | TCCTGTTTGAATCTTCCAGTGGG   |                                 |

|               |                           |  |
|---------------|---------------------------|--|
| v62_mZfp746_F | AAAGACAGAGAGTAGGGCAGAGA   |  |
| v63_mZfp746_R | GCGCATTTTAGAACGGTAGTGAG   |  |
| v64_mZfp12_F  | TTTAGTGGGGATGGAGATGAGGA   |  |
| v65_mZfp12_R  | AGGATTTCTGGCACTCAACGTAT   |  |
| v66_mZfp553_F | TCAAGGAAGAGGAACAGTTAGCC   |  |
| v67_mZfp553_R | TCTCTGCGGTCCCATAAATCATC   |  |
| v68_mZfp707_F | TGACTGCCTAAGTAGATTGGCT    |  |
| v69_mZfp707_R | AGAACTGGCCAGATACAAATCA    |  |
| v86_mHprt_F   | TGCTCGAGATGTCATGAAGGAGA   |  |
| v87_mHprt_R   | AATGTAATCCAGCAGGTCAGCA    |  |
| v2_mJdp2_F    | AATACGCTGACATCCGCAACATT   |  |
| v3_mJdp2_R    | GCTTAGAACCAAACCTGGAAACG   |  |
| p52_mPer1_1F  | TGGACTCTGATATCCAGGAGCTCTC |  |
| p53_mPer1_1R  | GGGGACATCAGAGGGCCAACCTCCA |  |
| m89_mMt2_F    | GGCGCTGCAAATGCAAACAATGC   |  |
| m90_mMt2_R    | CACTTGTCGGAAGCCTCTTTGCGAG |  |
| v80_mTGIF1_F  | CCAACTACGCAGGAATGAAATGG   |  |
| v81_mTGIF1_R  | CTGAGAAAGGATGGCAAAGATCC   |  |
| b90_mActb_F   | AGGTGTGCACTTTTATTGGTCTCAA |  |
| b91_mActb_R   | TGTATGAAGGCTTTGGTCTCCCT   |  |

### ChIP primers

|                       |                                 |                          |
|-----------------------|---------------------------------|--------------------------|
| p82_mPer1_p1145_F     | TACAGGACCGCTGTCGTTGGGTT         | chr11: 68910509-68910585 |
| p83_mPer1-p1145_R     | CGTGTTCTCTTGGCTGATGGCCC         |                          |
| p72_mCited_p588_F     | CCAAAGCCCGGAGAAACACAGCT         | chr10:17443015-17443120  |
| p73_mCited_p588_R     | GGAGCAAATTCGAGCCGTTCCC          |                          |
| w3_mKlf2_p7960wa_F    | AGATCTTGCCTTGGCATTCAAAC         | chr8:74827635-74827739   |
| w4_mKlf2_p7960wa_R    | CAGAAGATTTTCCAGCGTCATCC         |                          |
| u81_mKLF9_4126wa_F    | GCTCGTTGGACAAAGAGATGATG         | chr19:23209504+23209609  |
| u82_mKLF9_4126wa_R    | CTGTGGTTGTTGTGGAACAGTTT         |                          |
| u75_mNfil3_2021wa_F   | TTCCAAATGACTCAGGGATGTGT         | chr13:53080928-53081070  |
| u76_mNfil3_2021wa_R   | CCAACACCTACATCTCCTGTTGA         |                          |
| u77_mJdp2_1702wa_F    | AAGAACAGGACGTTCTTGTAGCA         | chr12:86873677-86873806  |
| u78_mJdp2_1702wa_R    | GCATCTGTCACTAACAGGCTTTC         |                          |
| w9_mTiparp_p5251wa_F  | GGAGGCAGATAAAACAAAGGCAAC        | chr3:65331894-65331999   |
| w10_mTiparp_p5251wa_R | AGATGCAGGGTCACCGTGT             |                          |
| w13_mNcoa5_p5035wa_F  | CTTACAAAGTGCTCATTCTGTCCC        | chr2:164852840-164852929 |
| w14_mNcoa5_p5035wa_R  | CCAGCTGAAGAGTTGTAAGGAC          |                          |
| u89_mKLF4+550_F       | TAATCTTCGTTGACTTTGGGGCT         | chr4:55544718-55544821   |
| u90_mKLF4+550_R       | CAAGTCCAACATCTCACCTACCT         |                          |
| u91_mKLF4+2.9_F       | CAGAAGCCTTTTGCTTGATGGAT         | chr4:55542357-55542435   |
| u92_mKLF4+2.9_R       | AACTCCCTATCTTTTAAAGGCCCA        |                          |
| u93_mKLF4+4.1_F       | CATGCAGTAGAATTTGCTCTCTGG        | chr4:55541199-55541286   |
| u94_mKLF4+4.1_R       | TGAAGCCATTGCTAGAAGGAAGAA        |                          |
| u95_mKLF4_GRE3_F      | CAAACGTGTGTATATGTACATGTTACATTTT | chr4:55539368-55539632   |
| u96_mKLF4_GRE3_R      | CTTCAGAGACATTCAGGAAGCTTTGAG     |                          |
| u97_mKLF4_GRE2_F      | CCTTAAAGTGGCTCACTTTACAAAGTAATGC | chr4:55547103-55547282   |
| u98_mKLF4_GRE2_R      | ATTCCCTTGGAAGTGGCCAGTTTAACTC    |                          |
| u99_mKLF4_GRE1_F      | GCTAATGAGTCTAGAGCTGAGAGC        | chr4:55549100-55549271   |
| v1_mKLF4_GRE1_R       | GGAGATAGATGGGGACCATCACTTTAT     |                          |
| p86_mFKBP5_p3472_F    | TGGACGGAATGTTCTAGTCAGGGCAG      | chr17:28628146-28628238  |
| p86a_mFKBP5_p3472_R   | ACCAGCCCAGGTTTAGCCTTGCT         |                          |
| p89_mFKBP5_p3469_F    | CAGGCCAGCAGCATAAGGAAGA          | chr17:28600899-28601017  |
| p90_mFKBP5_p3469_R    | GCATCGTCTGCGTCTTTCCACAT         |                          |
| p91_mFKBP5_p3468_F    | ACCTAGCTCAGCACAAATGCTGGAC       | chr17:28579402-28579534  |

|                     |                              |                         |
|---------------------|------------------------------|-------------------------|
| p92_mFKBP5_p3468_R  | ACCATTCCTGCTGTTTAGGCGC       |                         |
| p95_mFKBP5_p3465_F1 | GCACATCAAGTGAGTCTGGTCACTGC   | chr17:28557168-28557294 |
| p96_mFKBP5_p3465_R2 | TGCCAGCCACATTCAGAACAGGG      |                         |
| h27_rRNA_F          | GATCCTTCGATGTCCGGCTCTTCCTATC | GI:225637499            |
| h28_rRNA_R          | AGGGTAAACTAACCTGTCTCACG      |                         |
